# Supplementary material for: Ultrafast probes of electron–hole transitions between two atomic layers
Source: PubMed Central journal article supplement (PMC5945657; doi:10.1038/s41467-018-04291-9), 2018-05-10
Supplement: 41467_2018_4291_MOESM2_ESM.pdf [file 41467_2018_4291_MOESM2_ESM.pdf]

1

2

3

4

5

6

7

8

**Supplementary Information for**

9

**Ultrafast probes of electron-hole transitions between two atomic layers**

10

Wen et al.

11

12 **Supplementary Information for**

13 **Ultrafast probes of electron-hole transitions between two atomic layers**

14 Xiewen Wen<sup>2†</sup>, Hailong Chen<sup>4†</sup>, Tianmin Wu<sup>6†</sup>, Zhihao Yu<sup>1†</sup>, Qirong Yang<sup>1</sup>, Jingwen  
15 Deng<sup>1</sup>, Zhengtang Liu<sup>1</sup>, Xin Guo<sup>1</sup>, Jianxin Guan<sup>1</sup>, Xiang Zhang<sup>2</sup>, Yongji Gong<sup>2</sup>,  
16 Jiangtan Yuan<sup>2</sup>, Zhuhua Zhang<sup>2</sup>, Chongyue Yi<sup>5</sup>, Xuefeng Guo<sup>1</sup>, Pulickel M. Ajayan<sup>2</sup>,  
17 Wei Zhuang<sup>3\*</sup>, Zhirong Liu<sup>1\*</sup>, Jun Lou<sup>2\*</sup>, Junrong Zheng<sup>1\*</sup>

18 1 College of Chemistry and Molecular Engineering, Beijing National Laboratory  
19 for Molecular Sciences, Peking University, Beijing 100871, China

20 2 Department of Materials Science and NanoEngineering, Rice University, 6100  
21 Main Street, Houston, Texas 77005-1892, United States

22 3 State Key Laboratory of Structural Chemistry, Fujian Institute of Research on the  
23 Structure of Matter, Chinese Academy of Sciences, Fuzhou, Fujian 350002, China

24 4 Beijing National Laboratory for Condensed Matter Physics, CAS Key Laboratory  
25 of Soft Matter Physics, Institute of Physics, Chinese Academy of Sciences,  
26 Beijing 100190, China

27 5 Department of Chemistry, Rice University, 6100 Main Street, Houston, Texas  
28 77005-1892, United States

29 6 Department of Chemical Physics, University of Science and Technology of China,  
30 Hefei, Anhui 230026, China

31 †These authors contributed equally to the work

32 \*To whom correspondence should be addressed: junrong@pku.edu.cn,

33 zhengjunrong@gmail.com, jlou@rice.edu, wzhuang@fjirms.ac.cn,

34 [liuzhirong@pku.edu.cn](mailto:liuzhirong@pku.edu.cn)

35

36

37

38

39

40

41

42

43

44

45

46

47

48

49

50

51

52

53

54

55

56

## Supplementary Figures

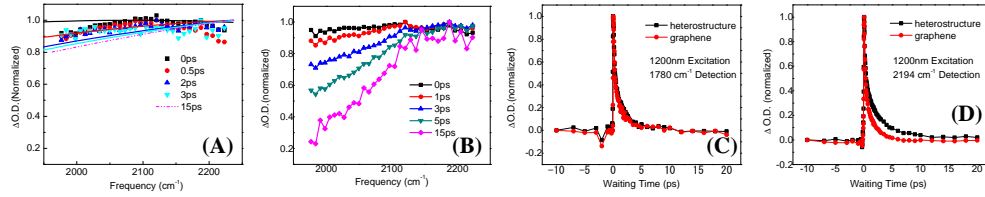

57

58 **Supplementary Figure 1.** *Waiting time dependent IR spectra of monolayer graphene*59 *and heterostructure after excitation with 1.03 eV photons. (A) Graphene; (B)*60 *heterostructure; (C) pump/probe data detected at 1780 cm<sup>-1</sup>; (D) pump/probe data*61 *detected at 2194 cm<sup>-1</sup>. Dots are data, and lines are calculations. Calculation*62 *parameters: graphene Fermi level  $\mu = -0.19$  eV, phonon fraction  $f_{SCOPs} = 0.15$ ,*63 *photon flux absorbed  $F = 0.0069$  J/m<sup>2</sup>, pump/probe response time  $t = 170$  fs, and*64 *electron-phonon coupling parameter  $\eta = 6.0 \frac{eV}{\text{\AA}}$ . These parameters are used for all*65 *calculations for graphene monolayer excited with 1.03 eV.*

66

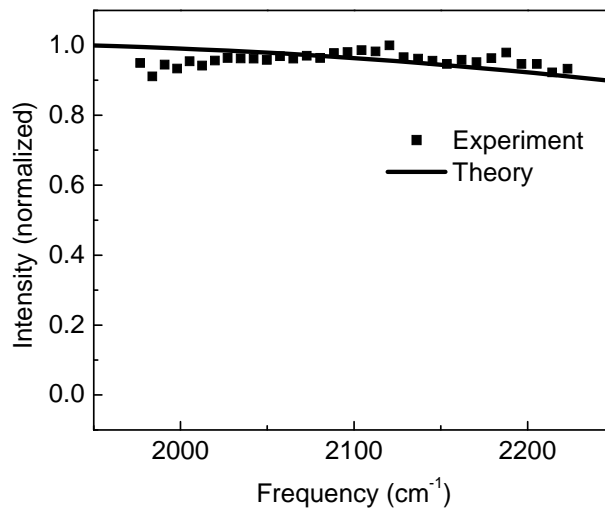

67

68 **Supplementary Figure 2.** *Spectrum of heterostructure at  $t = 0$  ps after excitation*

69 with 1.03 eV photons. Dots are data, and the line is calculation. Calculation  
 70 parameters: graphene Fermi level  $\mu = -0.17$  eV, phonon fraction  $f_{SCOPs} = 0.15$ ,  
 71 photon flux absorbed  $F = 0.0046$  J/m<sup>2</sup>, response time  $t = 170$  fs, and  
 72 electron-phonon coupling parameter  $\eta = 6.0 \frac{eV}{\text{\AA}}$ .  
 73

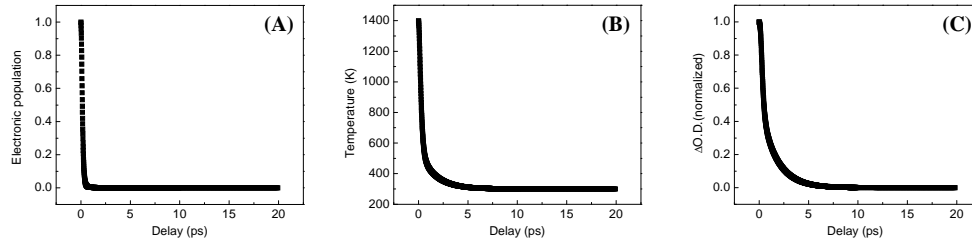

74

75 **Supplementary Figure 3.** (A) Calculated electronic population relaxation in  
 76 heterostructure after 1.03 eV excitation. (B) Calculated temperature of graphene in  
 77 heterostructure. (C) Calculated transient IR signal (2185 cm<sup>-1</sup>) of graphene in  
 78 heterostructure after 1.03 eV excitation. Calculation parameters: graphene Fermi  
 79 level  $\mu = -0.17$  eV, phonon fraction  $f_{SCOPs} = 0.15$ , photon flux absorbed  
 80  $F = 0.0046$  J/m<sup>2</sup>, pump response time  $t = 170$  fs, and electron-phonon coupling  
 81 parameter  $\eta = 6.0 \frac{eV}{\text{\AA}}$ . Subtracting (C) from the experimental signal of  
 82 heterostructure (Supplementary Figure 3E) yields the excitonic signal (Supplementary  
 83 Figure 3F). Here the temperature increase from energy released from exciton  
 84 formation is ignored. The signal reduction because of exciton formation is not  
 85 considered either. The effects of these two factors on the graphene signal are opposite.  
 86 Because of this, we estimate the uncertainty of the exciton formation time introduced  
 87 by the approximations to be <20% (on average around 25% free carriers form

88 excitons). The exciton formation rate is slightly underestimating by this method.

89

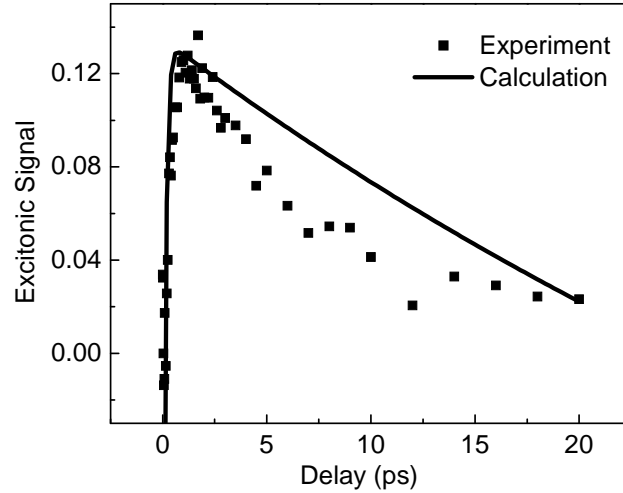

90

91 **Supplementary Figure 4.** Excitonic signal of heterostructure after 1.03 eV excitation.

92 The data (dots) are obtained by directly subtracting the graphene signal from the

93 heterostructure signal. Calculations (line) show that the excitonic formation time is

94 325 fs, which is essentially the same as 364 fs of Supplementary Figure 3F. Both time

95 constants are not normalized to the absorption cross section. The line is a

96 biexponential with  $t_1=120$  fs (electronic decay time constant from graphene

97 calculations) with factor -0.37, and  $t_2=55$  ps with factor 0.37. In Supplementary

98 Figure 3F, the calculation for excitonic signal uses parameters:  $t_1=120$  fs (electronic

99 decay time constant from graphene calculations) with factor -0.33, and  $t_2=65$  ps with

100 factor 0.33.

101

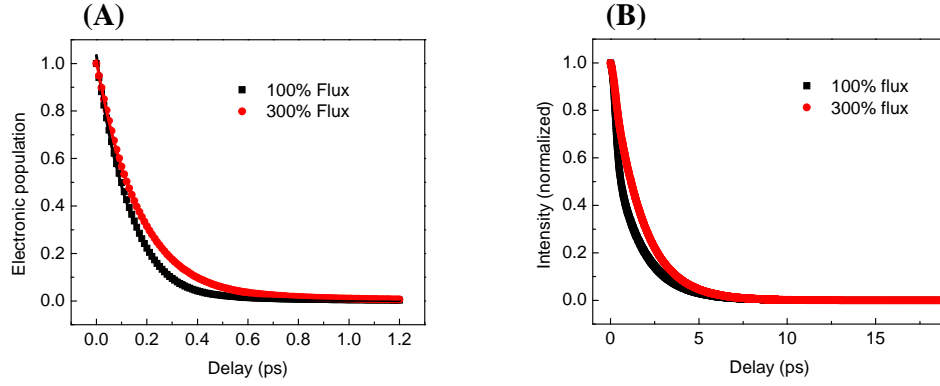

102

103 **Supplementary Figure 5.** *Calculated graphene 400nm-excitation/2185cm<sup>-1</sup>-detection*  
 104 *electronic dynamics (A) and signals (B) with two different excitation fluxes.*

105 *Calculation parameters: graphene Fermi level  $\mu = -0.17$  eV , phonon*  
 106 *fraction  $f_{SCOPs} = 0.15$  , photon flux absorbed*

107  *$F = 0.0087 \frac{J}{m^2}$  (100%flux) and  $0.0261 \frac{J}{m^2}$ , pump response time  $t = 170$ fs, and*  
 108 *electron-phonon coupling parameter  $\eta = 6.0 \frac{eV}{\text{\AA}}$ . The electronic decay time is 130fs*

109 *with 100% and 170fs with 300% flux.*

110

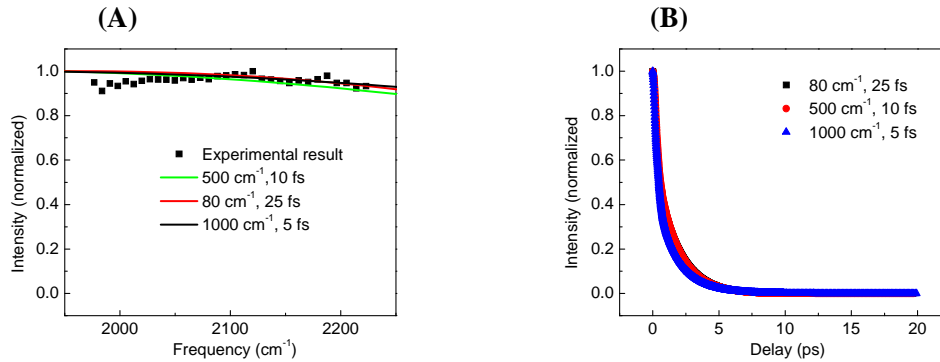

111

112 **Supplementary Figure 6.** *Comparisons of calculations with different electronic*  
 113 *dephasing linewidths and times of graphene. Calculation parameters: graphene*

114 *Fermi level  $\mu = -0.17$  eV, phonon fraction  $f_{SCOPs} = 0.20$ ,  $f_{SCOPs} = 0.15$ ,  $f_{SCOPs} =$*   
 115 *0.1 for calculations with  $\Gamma = 80$  cm<sup>-1</sup> and  $\tau_e = 25$  fs,  $\Gamma = 500$  cm<sup>-1</sup> and  $\tau_e = 10$  fs,  $\Gamma =$*

116  $1000 \text{ cm}^{-1}$  and  $\tau_e = 5 \text{ fs}$ , respectively; photon flux absorbed  
117  $F = 0.0087 \frac{\text{J}}{\text{m}^2}$  (100% flux), pump response time  $t = 170 \text{ fs}$ , and electron-phonon  
118 coupling parameter  $\eta = 6.0 \frac{\text{eV}}{\text{\AA}}$ . The parameters only slightly affect the linshape and  
119 dynamics.  
120

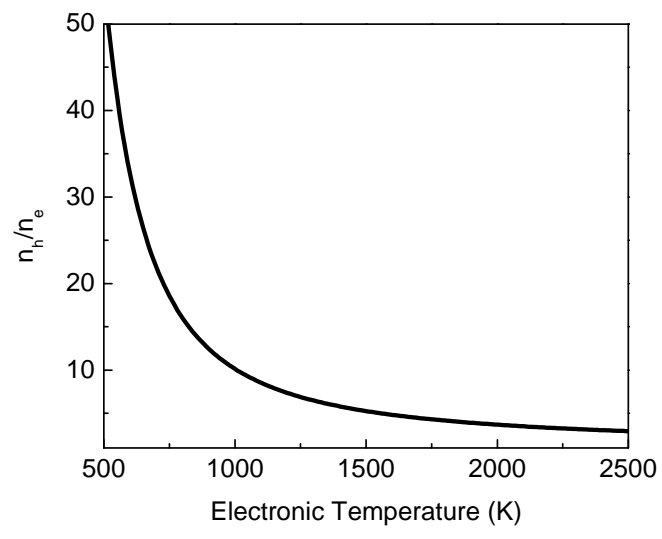

121  
122 **Supplementary Figure 7.** Temperature dependent  $n_h/n_e$   
123



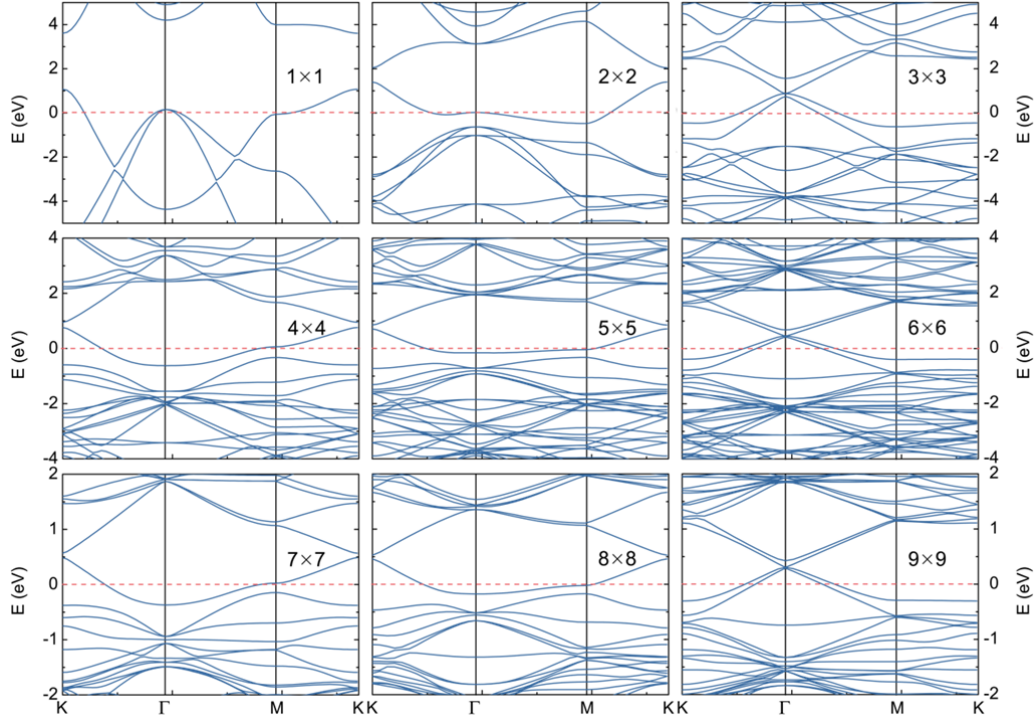

124

125 **Supplementary Figure 8.** Band structure. Electronic band structures of boron-doped

126 graphene with different primitive cell.

127

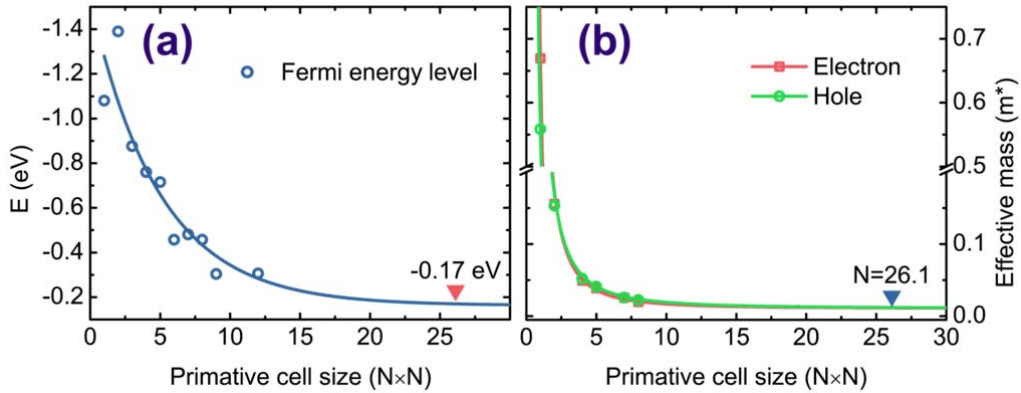

128

129 **Supplementary Figure 9.** (a) Fermi energy level of boron-doped graphene with

130 different primitive cell. (b) The effective mass of B-doped system for electron and hole

131 transport with different primitive cell. As the Fermi energy level is -0.17 eV, the

132 primitive cell size is  $26.1 \times 26.1$ , and the corresponding hole and electron effective

133 mass is 0.0121 and 0.0116, respectively.

134

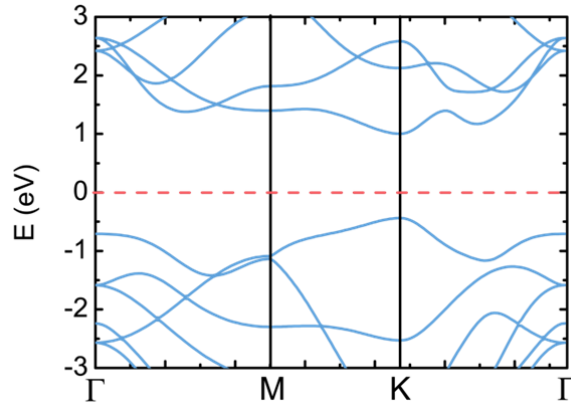

135

136 **Supplementary Figure 10.** The calculated Electronic band structures of monolayer

137 *MoSe<sub>2</sub>*, underestimates the band gap by around 0.5 eV.

138

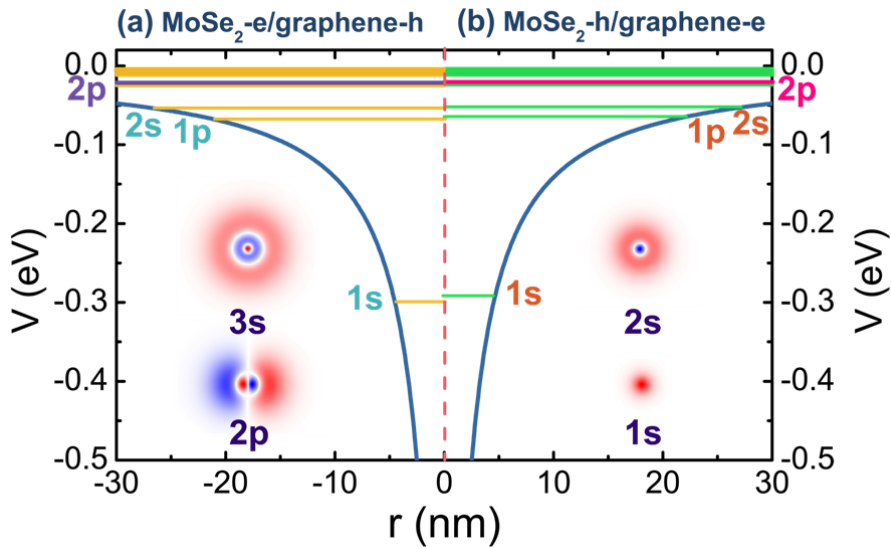

139

140 **Supplementary Figure 11.** Also Supplementary Figure 3D in main text. A few

141 eigenvalues are shown on the Model Coulomb potential as a function of in-plane

142 radius for an electron-hole pair across the graphene/*MoSe<sub>2</sub>* heterojunction van der

143 Waals interface. (a) Hole is in graphene and electron is in the *MoSe<sub>2</sub>* monolayer. (b)

144 *Hole is in MoSe<sub>2</sub> and electron is in graphene. Wave functions of several states are*  
 145 *also shown. (red/blue: positive/negative.)*

146

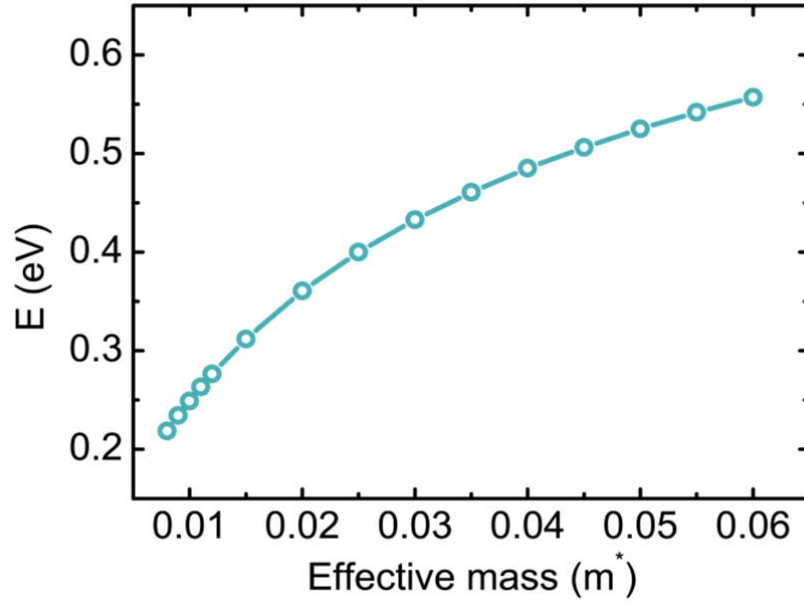

147

148 **Supplementary Figure 12.** *The exciton transition energy (1s-2p) of graphene/MoSe<sub>2</sub>*  
 149 *correlated with effective mass of the excitonic quasi particle.*

150

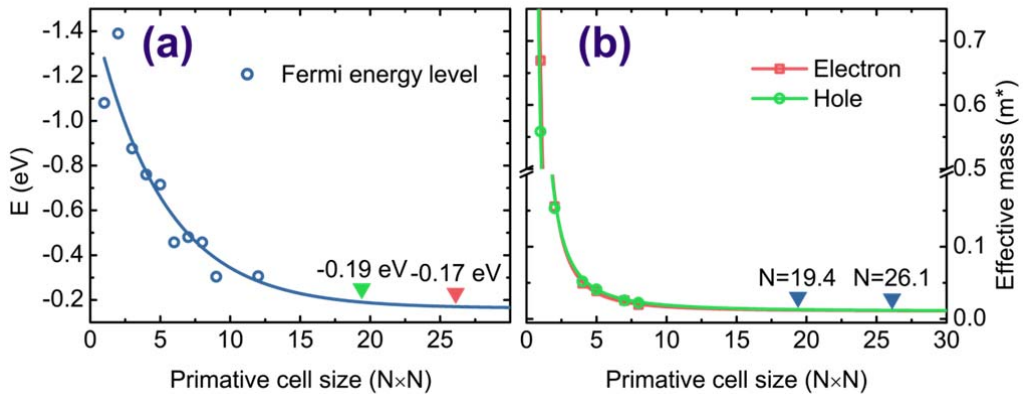

151

152 **Supplementary Figure 13.** *(a) Fermi energy level of boron-doped graphene with*  
 153 *different primitive cell. (b) The effective mass of B-doped system for electron and hole*

154 transport with different primitive cell. When the Fermi energy level is  $-0.19$  eV, the  
 155 primitive cell size is  $19.4 \times 19.4$ , and the corresponding hole and electron effective  
 156 mass is  $0.0132$  and  $0.0122$ , respectively.

157

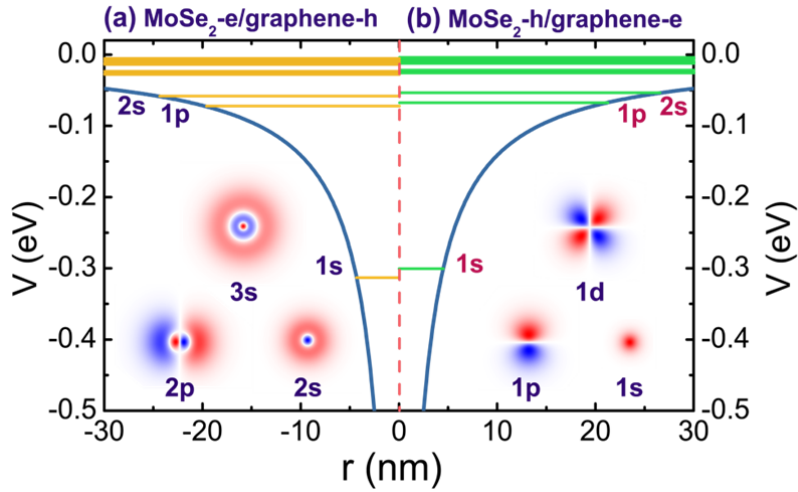

158

159 **Supplementary Figure 14.** A few eigenvalues are shown on the Model Coulomb  
 160 potential as a function of in-plane radius for an electron-hole pair across the  
 161 graphene/MoSe<sub>2</sub> heterojunction van der Waals interface. **(a)** Hole is in graphene and  
 162 electron is in MoSe<sub>2</sub> monolayer. **(b)** Hole is in MoSe<sub>2</sub> slab and electron is in graphene.  
 163 Several wave functions are also shown. (red/blue: positive/negative.) Fermi level  
 164  $-0.19$  eV.

165 graphene\_hole/MoSe<sub>2</sub>\_electron:  $E_{1s-2p} = 0.287$  eV,  $\langle \rho_{CT_{1s}} \rangle = 43.1$  Å

166 graphene\_electron/MoSe<sub>2</sub>\_hole:  $E_{1s-2p} = 0.276$  eV,  $\langle \rho_{CT_{1s}} \rangle = 45.1$  Å

167

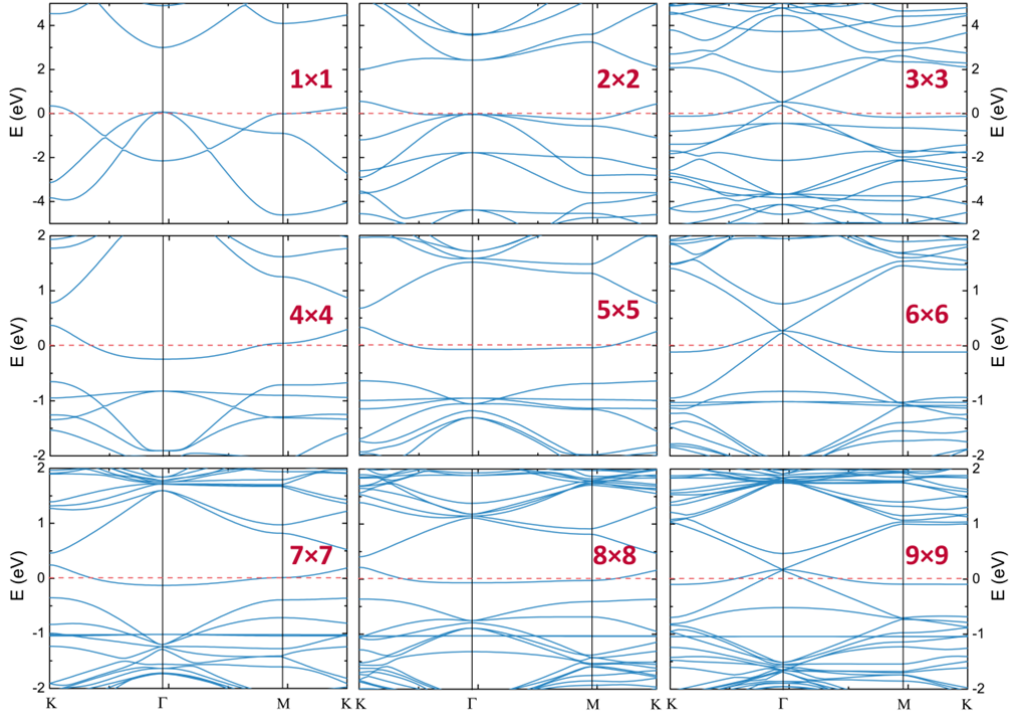

168

169 **Supplementary Figure 15.** *Band structure. Electronic band structures of*  
 170 *aluminum-doped graphene with different primitive cell.*

171

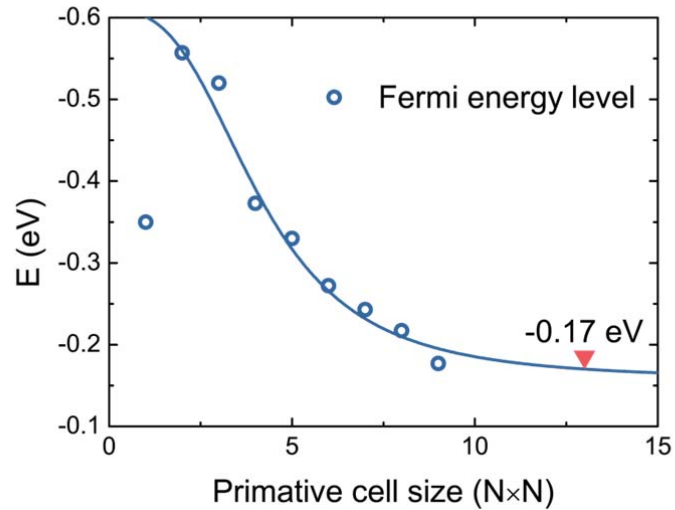

172

173 **Supplementary Figure 16.** *Fermi energy level of aluminum-doped graphene with*  
 174 *different primitive cell.*

175

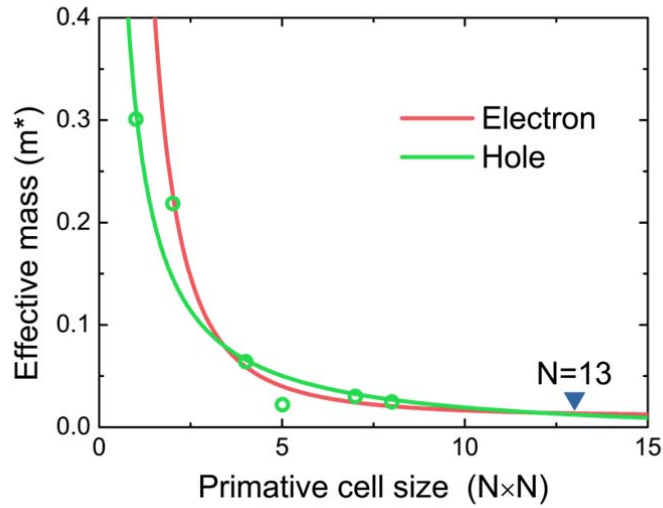

176

177 **Supplementary Figure 17.** The effective mass of B-doped system for electron and  
178 hole transport with different primitive cell. As the Fermi energy level is  $-0.17$  eV, the  
179 primitive cell size is  $13 \times 13$ , and the corresponding hole and electron effective mass is  
180  $0.0122$  and  $0.0135$ , respectively.

181

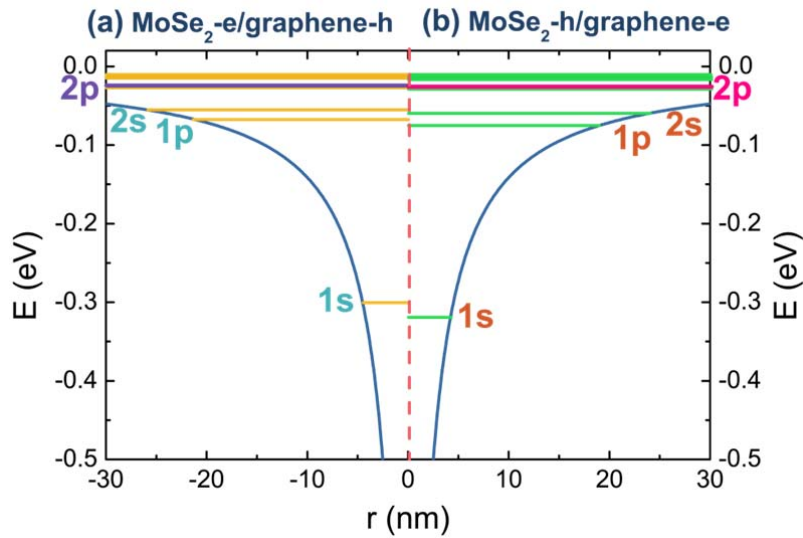

182

183 **Supplementary Figure 18.** A few eigenvalues are shown on the Model Coulomb

184 potential as a function of in-plane radius for an electron-hole pair across the  
 185 graphene/MoSe<sub>2</sub> heterojunction van der Waals interface. (a) Hole is in graphene and  
 186 electron is in the MoSe<sub>2</sub> monolayer. (b) Hole is in MoSe<sub>2</sub> and electron is in graphene.  
 187 Wave functions of several states are also shown. (red/blue: positive/negative.)  
 188

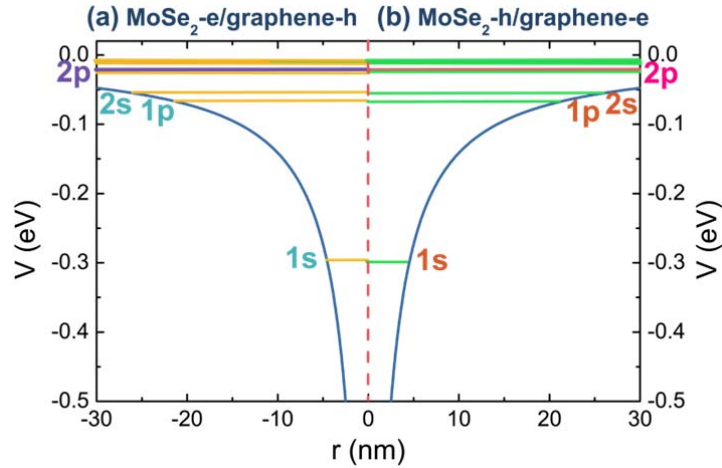

189  
 190 **Supplementary Figure 19.** A few eigenvalues are shown on the Model Coulomb  
 191 potential as a function of in-plane radius for an electron-hole pair across the  
 192 graphene/MoSe<sub>2</sub> heterojunction van der Waals interface. (a) Hole is in graphene and  
 193 electron is in MoSe<sub>2</sub> monolayer. (b) Hole is in MoSe<sub>2</sub> slab and electron is in graphene.  
 194 Several wave functions are also shown. (red/blue: positive/negative.)

195 graphene\_hole/MoSe<sub>2</sub>\_electron:  $E_{1s-2p} = 0.273 \text{ eV}$ ,  $\langle \rho_{CT_{1s}} \rangle = 46.4 \text{ \AA}$

196 graphene\_electron/MoSe<sub>2</sub>\_hole:  $E_{1s-2p} = 0.274 \text{ eV}$ ,  $\langle \rho_{CT_{1s}} \rangle = 45.4 \text{ \AA}$

197

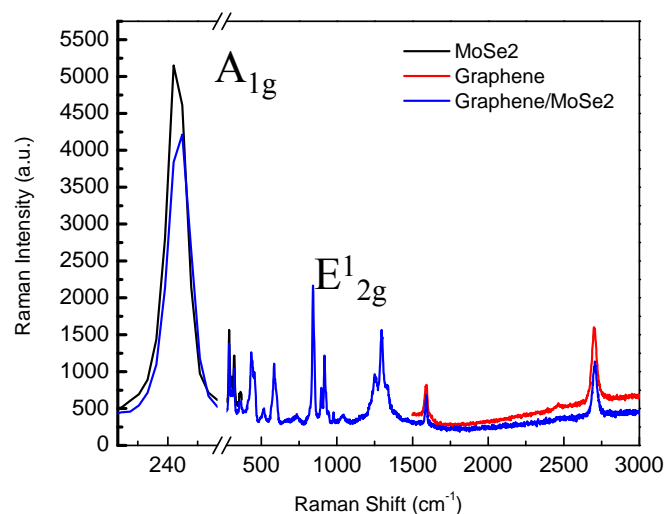

198

199 **Supplementary Figure 20.** Raman spectroscopy of graphene, MoSe<sub>2</sub> and

200 graphene/MoSe<sub>2</sub> vdW heterostructure. The frequencies of vibrational modes A<sub>1g</sub> (242

201 cm<sup>-1</sup>) and E<sub>2g</sub><sup>1</sup> (288 cm<sup>-1</sup>) of the standalone MoSe<sub>2</sub> sample and the heterostructures

202 match previously reported data of monolayer MoSe<sub>2</sub><sup>26</sup>. The characteristic 2D (2690

203 cm<sup>-1</sup>) and G (1580 cm<sup>-1</sup>) peaks of single-layered graphene are present in both the

204 graphene/MoSe<sub>2</sub> heterostructures and the standalone graphene sample.

205



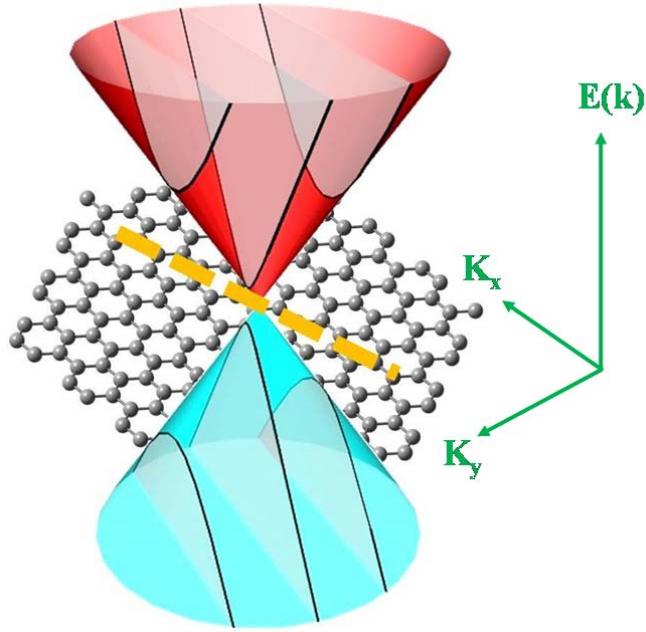

206

207 **Supplementary Figure 21.** *Schematic illustration of the finite effective mass when  $k$*   
 208 *deviates away from the Dirac point of graphene. Some  $k$ -lines on the Dirac cones*  
 209 *along a specified direction were shown as solid lines, which clearly have finite*  
 210 *curvature (effective mass).*

211

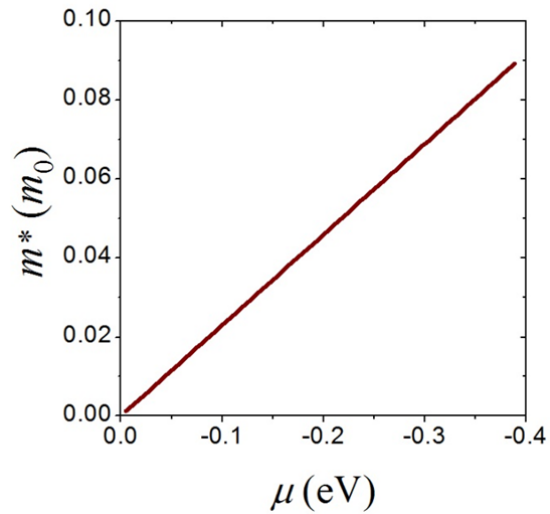

212

213 **Supplementary Figure 22.** *The effective mass  $m^*$  (in units of  $m_0$ , the mass of the free*  
 214 *electron) at the level of chemical potential  $\mu$  along the normal direction of Dirac cone*

215 in doped graphene. Supplementary Equation (24) is used in the plot.

216

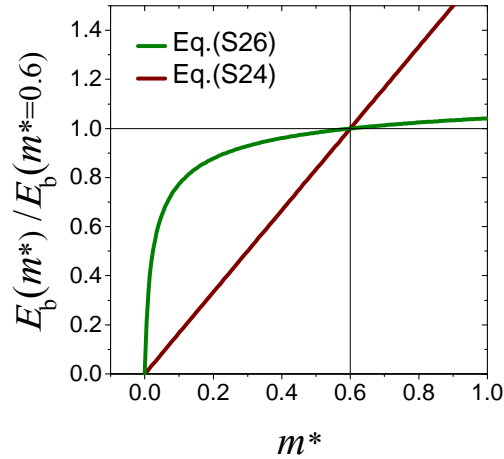

217

218 **Supplementary Figure 23.** The exciton binding energy as a function of the effective  
219 mass  $m^*$  (in units of  $m_0$ , the mass of the free electron). The binding energy was  
220 measured with respect to that of  $\text{MoSe}_2$  ( $m^* = 0.6$ ). Supplementary Equation (26)  
221 and (28) were used in plotting the curves.

222

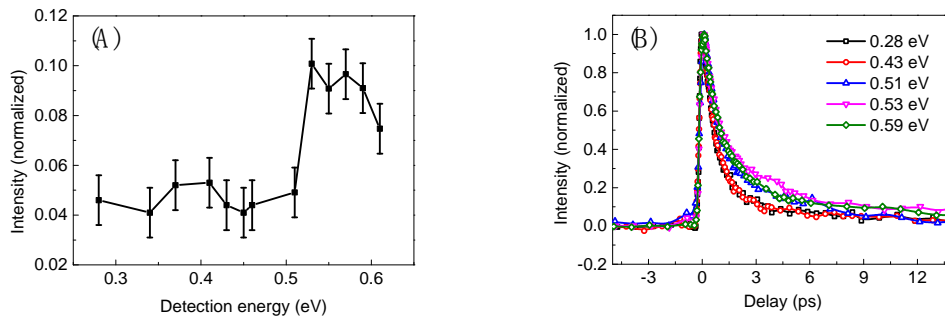

223

224 **Supplementary Figure 24.** (A) Detection frequency dependent (0.28-0.59 eV) photo  
225 responses of monolayer  $\text{MoSe}_2$  at 10 ps (averaged between 8-12 ps to minimize noise)  
226 after excited with 400nm light. A resonance  $1s$ - $2p$  transition peak appears at 0.55 eV.  
227 The results indicate that the excitonic binding energy in monolayer  $\text{MoSe}_2$  is about 0.6  
228 eV. (B) Time dependent dynamics detected at different energy values. The transition  
229 between different dynamics starts at 0.51eV. The DFG midIR output from Topas OPA

230 combined with HgCdTe detector was used for detection frequencies below 0.47eV. The  
231 Idler output of a Palitra OPA combined with an InSb detector was used for detection  
232 frequencies above 0.47 eV.

233

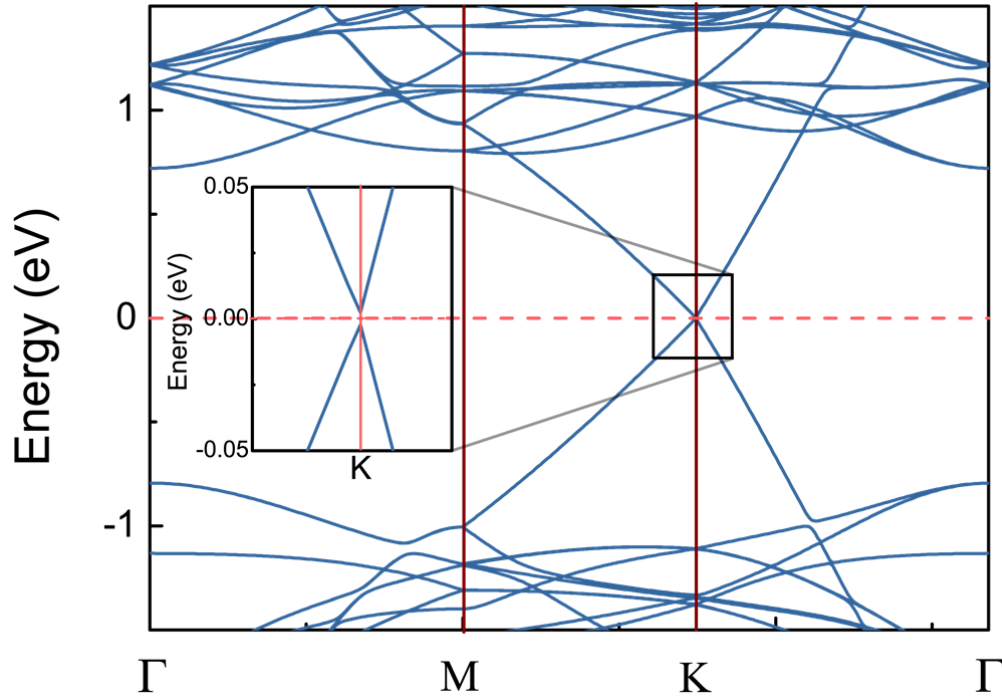

234

235 **Supplementary Figure 25.** The band structure of a graphene/MoSe<sub>2</sub> heterostructure.

236 The symmetry of graphene is broken, and its band structure is opened with a gap of ~

237 4.4 meV (the insert). This generates a carrier mass around 0.0004  $m_0$ . This

238 phenomenon was also previously observed in calculations on a graphene/MoSe<sub>2</sub>

239 heterostructure (JPCC, 115, 20237, 2011). However, the gap is significantly smaller

240 than the thermal energy (26 meV) at room temperature, the effects it induced at room

241 temperature under which our experiments were conducted are expected to be very

242 small.

243

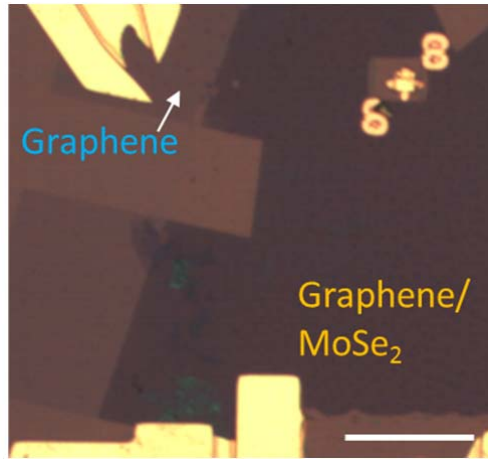

244

245 **Supplementary Figure 26.** *MoSe<sub>2</sub>/Graphene device used in the measurements, scale*  
 246 *bar: 10 μm. MoSe<sub>2</sub>/graphene vdW heterostructure device for photocurrent*  
 247 *measurements. A monolayer of graphene (the lighter image in the center) is*  
 248 *transferred on the top of A monolayer of MoSe<sub>2</sub> which is on a silicon wafer. Cr/Au*  
 249 *(8nm/120nm) electrodes were deposited using E-beam lithography and lift-off*  
 250 *technique. Both electrodes are on the top of graphene. One is on the top of graphene*  
 251 *underneath which is Si (with a thin layer of SiO<sub>2</sub>). The other electrode is on the top of*  
 252 *graphene underneath which is MoSe<sub>2</sub>.*

253

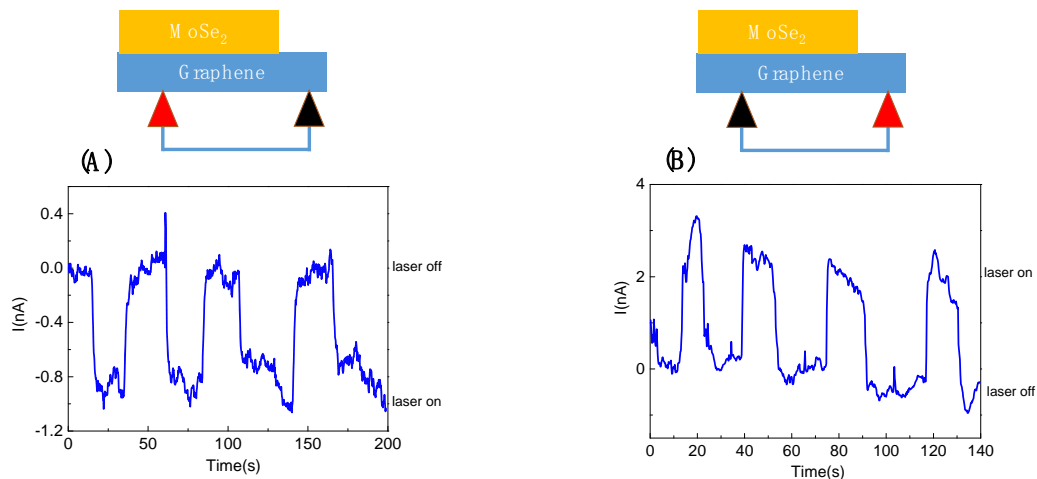

254

255 **Supplementary Figure 27.** *Photocurrent ( $I_{ph}=I_{light}-I_{dark}$ ) of MoSe<sub>2</sub>/Graphene vdW*  
 256 *heterostructure under 980nm excitation. The photons only excite graphene but not*  
 257 *MoSe<sub>2</sub>. Top panel: measurement configurations (A) in which the external current*  
 258 *flows from graphene on the top of MoSe<sub>2</sub> to graphene on the top of Si (with a thin*  
 259 *layer of SiO<sub>2</sub>), and (B) the external current direction is flipped. The background*  
 260 *current is subtracted. Both results unambiguously demonstrate that the*  
 261 *photoexcitation generates an overall electron flow from MoSe<sub>2</sub> to graphene inside the*  
 262 *heterostructure. After photoexcitation, electrons move from MoSe<sub>2</sub> to graphene inside*  
 263 *the heterostructure. Therefore, more electrons exist in the area of graphene directly on*  
 264 *the top of MoSe<sub>2</sub> than in the area of graphene on the top of Si (with a thin layer of*

265  $\text{SiO}_2$ ). This results in external current flowing from graphene on the top of Si to  
 266 graphene on the top of  $\text{MoSe}_2$ . The photocurrent measurements were conducted with  
 267 a semiconductor parameter analyzer (Agilent 4155C) and a probe station. The  
 268 source/drain bias  $V_{sd} = 0$  and the gate voltage  $V_g = 0$  in all tests. The two  
 269 measurements were conducted under slightly different laser focus sizes.  
 270

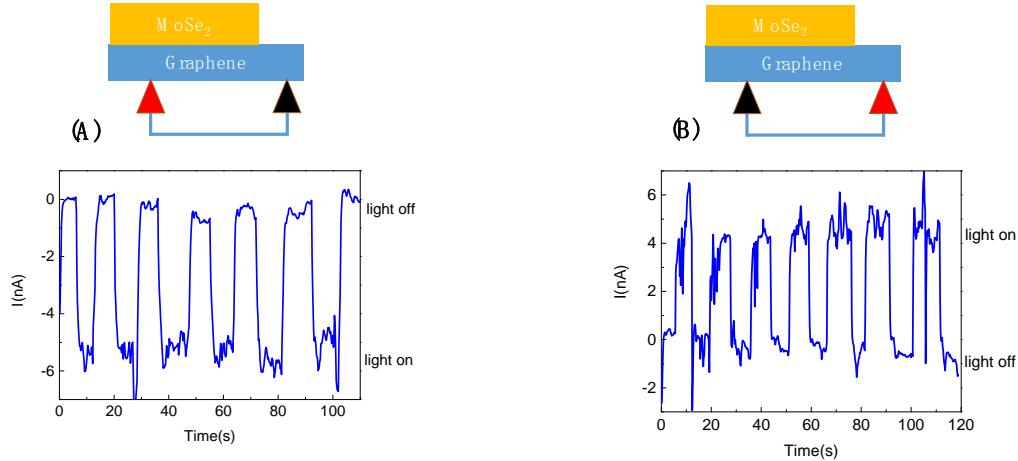

271  
 272 **Supplementary Figure 28.** Photocurrent ( $I_{ph} = I_{light} - I_{dark}$ ) of  $\text{MoSe}_2/\text{Graphene}$  vdW  
 273 heterostructure under 405nm excitation. The photons excite both graphene and  $\text{MoSe}_2$ .  
 274 Top panel: measurement configurations (A) in which the external current flows from  
 275 graphene on the top of  $\text{MoSe}_2$  to graphene on the top of Si (with a thin layer of  $\text{SiO}_2$ ),  
 276 and (B) the external current direction is flipped. The background current is subtracted.  
 277 Both results unambiguously demonstrate that the photoexcitation generates an overall  
 278 electron flow from  $\text{MoSe}_2$  to graphene inside the heterostructure. After  
 279 photoexcitation, electrons move from  $\text{MoSe}_2$  to graphene inside the heterostructure.  
 280 Therefore, more electrons exist in the area of graphene directly on the top of  $\text{MoSe}_2$   
 281 than in the area of graphene on the top of Si (with a thin layer of  $\text{SiO}_2$ ). This results in  
 282 external current flowing from graphene on the top of Si to graphene on the top of  
 283  $\text{MoSe}_2$ . The photocurrent measurements were conducted with a semiconductor  
 284 parameter analyzer (Agilent 4155C) and a probe station. The source/drain bias  $V_{sd}$   
 285  $= 0$  and the gate voltage  $V_g = 0$  in all tests. Similar photocurrent phenomena was also  
 286 observed in  $\text{MoS}_2/\text{Graphene}$  vdW heterostructures (ref: Scientific Reports 4, 3826  
 287 (2014)).  
 288

289

## Supplementary Notes

### 290 **Supplementary Note 1: Optical conductivity of graphene**

291 The tight-binding Hamiltonian for the cone-like band structure of graphene is  
292 written as

$$293 \quad H = \begin{bmatrix} 0 & \hbar v_F (k_x + ik_y) \\ \hbar v_F (k_x - ik_y) & 0 \end{bmatrix}, \quad (1)$$

294 where  $v_F$  is the Fermi velocity, and  $k_x$  and  $k_y$  are 2D components of the electronic  
295 wave vector  $\mathbf{k}$ . With the Hamiltonian, the optical conductivity  $[\sigma(\omega)]$  is written as the  
296 sum of the interband conductivity  $[\sigma_{\text{inter}}(\omega)]$  and the intraband conductivity  $[\sigma_{\text{intra}}(\omega)]$   
297 given below<sup>1, 2, 3, 4</sup>:

$$298 \quad \begin{aligned} \sigma(\omega) &= \sigma_{\text{inter}}(\omega) + \sigma_{\text{intra}}(\omega) \\ \sigma_{\text{inter}}(\omega) &= i \frac{e^2 \hbar \omega}{\pi \hbar} \int_0^{+\infty} d\varepsilon \frac{1}{(2\varepsilon)^2 - (\hbar\omega + i\Gamma)^2} [f_{\text{FD}}(\varepsilon - \mu) - f_{\text{FD}}(-\varepsilon - \mu)], \\ \sigma_{\text{intra}}(\omega) &= i \frac{e^2 / \pi \hbar}{\hbar\omega + i\hbar/\tau_e} \int_0^{+\infty} d\varepsilon [f_{\text{FD}}(\varepsilon - \mu) + 1 - f_{\text{FD}}(-\varepsilon - \mu)] \end{aligned} \quad (2)$$

299 where  $f_{\text{FD}}$  is the Fermi-Dirac distribution function,  $\mu$  is the chemical potential (Fermi  
300 energy), and  $e$  is the elementary charge.  $\Gamma$  is the broadening of the interband  
301 transitions, and  $\tau_e$  is the relaxation time due to intraband carrier scattering. In  
302 literature<sup>5, 6</sup>,  $\Gamma$  lies between 0.01 and 0.06 eV while  $\tau_e$  is in the range of 5 ~ 40 fs.  
303 Here, considering that electronic motions typically occur within a few fs rather tens of  
304 fs, we use the fast values  $\Gamma = 0.062$  eV (500  $\text{cm}^{-1}$ ) and  $\tau_e = 10$  fs throughout the study.  
305 Nonetheless, effects of these two parameters are also tested and listed in  
306 Supplementary Figure 6. It turns out that the results are not very sensitive to the  
307 parameter selections.

308 Applying the Fresnel equations, the change of optical transmission due to the

309 existence of graphene is given as

$$310 \quad \frac{\Delta T_s}{T_0} \approx -\frac{2}{\cos \theta + n_{\text{sub}} \cos \theta''} \sqrt{\frac{\mu_0}{\epsilon_0}} \text{Re}[\sigma(\omega)] \quad (3)$$

311 for s-polarized light.  $\theta$  is the incident angle, and  $\theta''$  is the incident angle in the  
 312 substrate.  $n_{\text{sub}}$  is the refractive index of the substrate.  $\epsilon_0$  and  $\mu_0$  are vacuum  
 313 permittivity and permeability, respectively. For p-polarized light, the change of optical  
 314 transmission is

$$315 \quad \frac{\Delta T_p}{T_0} \approx -\frac{2 \cos \theta \cos \theta''}{n_{\text{sub}} \cos \theta + \cos \theta''} \sqrt{\frac{\mu_0}{\epsilon_0}} \text{Re}[\sigma(\omega)]. \quad (4)$$

316 In our experiments,  $\theta = 0^\circ$ , so we have

$$317 \quad \frac{\Delta T}{T_0} \approx -\frac{2}{1 + n_{\text{sub}}} \sqrt{\frac{\mu_0}{\epsilon_0}} \text{Re}[\sigma(\omega)], \quad (5)$$

318 where  $n_{\text{sub}} = 1.39$  for the used substrate (CaF<sub>2</sub>).

319

320 **Supplementary Note 2: Heat transfer between electrons and phonons in**  
 321 **graphene**

322 Strongly coupled optical phonons (COPs) are in-plane optical phonons for which  
 323 intra- and inter-valley carrier scattering can simultaneously conserve energy and  
 324 momentum<sup>7</sup>. The considered SCOPs include phonons near the  $\Gamma$ -point with energy  $\sim$   
 325 200 meV (for intra-valley carrier scattering) and those near the  $K$ -point with energy  
 326  $\sim$ 150 meV (for inter-valley carrier scattering). The interaction between phonons and  
 327 electrons/holes in graphene is described by a deformation potential theory,<sup>8,9</sup> and the  
 328 transition matrix element is determined to be

329 
$$M_{\mathbf{k}',\mathbf{k}}^{(\text{TO}\&\text{LO})} \approx 3\eta \sqrt{\frac{\hbar}{4M_C \omega_{\text{phonon}}}}, \quad (6)$$

330 where  $\eta$  is the electron-phonon coupling parameter, and  $M_C$  is the mass of a carbon  
 331 atom. The energy dispersion of the transverse optical (TO) and longitudinal optical  
 332 (LO) phonon modes is ignored, and Supplementary Equation (6) accounts for the total  
 333 contribution from TO and LO at  $\Gamma$ - or  $K$ -points. Both emission and absorption of the  
 334 phonons are considered under the second quantization. The probability of scattering  
 335 from  $\mathbf{k}$  to  $\mathbf{k}'$  by the SCOPs is

336 
$$\begin{aligned} W_{\mathbf{k}',\mathbf{k}}^{(\text{TO}\&\text{LO})} &= \frac{2\pi}{\hbar} \left| M_{\mathbf{k}',\mathbf{k}}^{(\text{TO}\&\text{LO})} \right|^2 \left[ N_{\mathbf{q}} \delta(\varepsilon_{\mathbf{k}} - \varepsilon_{\mathbf{k}'} + \hbar\omega_{\text{phonon}}) + (N_{\mathbf{q}} + 1) \delta(\varepsilon_{\mathbf{k}} - \varepsilon_{\mathbf{k}'} - \hbar\omega_{\text{phonon}}) \right] \\ &= \frac{9\pi\eta^2}{2M_C \omega_{\text{phonon}}} \left[ N_{\mathbf{q}} \delta(\varepsilon_{\mathbf{k}} - \varepsilon_{\mathbf{k}'} + \hbar\omega_{\text{phonon}}) + (N_{\mathbf{q}} + 1) \delta(\varepsilon_{\mathbf{k}} - \varepsilon_{\mathbf{k}'} - \hbar\omega_{\text{phonon}}) \right] \end{aligned} \quad (7)$$

337 where  $N_{\mathbf{q}}$  is the phonon occupation number described by the Bose-Einstein  
 338 distribution. The first and second terms in the square brackets correspond to the  
 339 phonon emission and absorption processes, respectively. Integrating  $\mathbf{k}'$  gives the  
 340 scattering rate of  $\mathbf{k}$  as

341 
$$\begin{aligned} R_{\mathbf{k} \rightarrow * } &= \int W_{\mathbf{k}',\mathbf{k}}^{(\text{TO}\&\text{LO})} \frac{A}{(2\pi)^2} d^2\mathbf{k}' \\ &= \frac{9\eta^2}{2\hbar^2 \rho v_F^2 \omega_{\text{phonon}}} \left[ (\varepsilon_{\mathbf{k}} + \hbar\omega_{\text{phonon}}) N_{\mathbf{q}} + (\varepsilon_{\mathbf{k}} - \hbar\omega_{\text{phonon}}) (N_{\mathbf{q}} + 1) \right] \end{aligned} \quad (8)$$

342 where  $\rho$  is the 2D mass density of graphene. Therefore, the rate of phonon emission  
 343 per unit area is

344 
$$\begin{aligned} \frac{dN_{\text{emission}}}{dt} &= \int \frac{9\eta^2}{2\hbar^2 \rho v_F^2 \omega_{\text{phonon}}} (\varepsilon_{\mathbf{k}} - \hbar\omega_{\text{phonon}}) (N_{\mathbf{q}} + 1) f_{\text{FD}}(\varepsilon_{\mathbf{k}}) (1 - f_{\text{FD}}(\varepsilon_{\mathbf{k}} - \hbar\omega_{\text{phonon}})) \frac{1}{(2\pi)^2} d^2\mathbf{k} \\ &= \frac{9\eta^2}{4\pi(\hbar v_F)^4 \rho \omega_{\text{phonon}}} (N_{\mathbf{q}} + 1) \int \varepsilon_{\mathbf{k}} (\varepsilon_{\mathbf{k}} - \hbar\omega_{\text{phonon}}) f_{\text{FD}}(\varepsilon_{\mathbf{k}}) (1 - f_{\text{FD}}(\varepsilon_{\mathbf{k}} - \hbar\omega_{\text{phonon}})) d\varepsilon_{\mathbf{k}} \end{aligned}$$



346 (9)

347 and the rate of phonon absorption is

$$348 \quad \frac{dN_{\text{adsorption}}}{dt} = \frac{9\eta^2}{4\pi(\hbar v_F)^4 \rho \omega_{\text{phonon}}} N_q \int \epsilon_{\mathbf{k}} (\epsilon_{\mathbf{k}} + \hbar \omega_{\text{phonon}}) f_{\text{FD}}(\epsilon_{\mathbf{k}}) (1 - f_{\text{FD}}(\epsilon_{\mathbf{k}} + \hbar \omega_{\text{phonon}})) d\epsilon_{\mathbf{k}},$$

349 (10)

350 which are used to simulate the heat transfer between electrons/holes and SCOPs.

351 The heat capacity of the SCOPs is described by the Einstein model, and the  
 352 fraction of Brillouin zone filled by the SCOPs,  $f_{\text{SCOPs}}$ , is assumed to be temperature  
 353 independent for simplicity<sup>4</sup>. The energy stored in the SCOP subsystem relaxes at a  
 354 rate of  $1/\tau_{\text{ph}}$  to lower energy phonons<sup>4,10</sup>. The value of  $f_{\text{SCOPs}}$  and  $\tau_{\text{ph}}$  are determined  
 355 by fitting the experimental probe signal profiles.

356

### 357 **Supplementary Note 3: Fermi level of graphene in heterostructure**

358 Graphene used in our experiments are p-doped with Fermi level -0.19 eV  
 359 determined by fitting the transient spectra and dynamics in Supplementary Figure 1  
 360 and Supplementary Figure 3E. MoSe<sub>2</sub> is n-doped. When the two monolayers were  
 361 placed together to form a heterostructure, some electrons transfer from MoSe<sub>2</sub> to  
 362 graphene<sup>11</sup>, raising the graphene Fermi level to -0.17 eV. The Fermi level of graphene  
 363 in heterostructure is obtained by fitting the transient IR spectrum of heterostructure at  
 364 time 0 with 1.03 eV excitation (Supplementary Figure 2). The carrier density of  
 365 graphene is

$$366 \quad n = \int \frac{1}{(2\pi)^2} f(\epsilon - \mu) d^2\mathbf{k} = \int \frac{k}{2\pi} f(\epsilon - \mu) dk = \int_0^{+\infty} \frac{\epsilon}{2\pi(\hbar v_F)^2} f(\epsilon - \mu) d\epsilon, \quad (11)$$

367 When  $|\mu| \gg k_B T$ , Supplementary Equation 11 can be simplified into (degenerate spin  
368 and KK'):

$$369 \quad n \approx \frac{\mu^2}{\pi(\hbar v_F)^2}. \quad (12)$$

370 According to Supplementary Equation 11&12, the Fermi level increase indicates  
371 that about  $5 \times 10^{11} \frac{e}{cm^2}$  have transferred from MoSe<sub>2</sub> to graphene after they form a  
372 heterostructure.

373

374 **Supplementary Note 4: Calculated IR response of graphene with Fermi level**  
375 **-0.17 eV**

376 In the heterostructure excited with 1.03 eV photons, the initial response is only  
377 from graphene. Because of fast interlayer charge transfers, some excited carriers  
378 move to MoSe<sub>2</sub> very rapidly (< 50 fs) and effectively reduce the electronic  
379 temperature in the graphene layer. In our calculations, we consider this problem  
380 equivalent to the reduction of excitation flux because the charge transfer and  
381 electronic thermalization are extremely fast (< 50 fs), much faster than the exciton  
382 formation and electron/phonon couplings. Under ideal fast equilibrium, at most 50%  
383 of the excitation energy is transferred to MoSe<sub>2</sub> by the transferred carriers. However,  
384 in our experiments, this is obviously not likely because very few electrons can reach  
385 CBM of MoSe<sub>2</sub>. Therefore, we set the upper limit of flux reduction as 1/3. Calculation  
386 results for the exciton formation time with no flux reduction to 1/3 reduction are all  
387 within experimental uncertainty.

388

389 **Supplementary Note 5: Excitonic signal from direct experimental data**  
390 **subtraction**

391 The excitonic signal presented in Supplementary Figure 3F is obtained by  
392 considering pump flux and Fermi level changes. Since these two parameters don't  
393 change significantly, we also directly subtract the signal of monolayer graphene from  
394 that of heterostructure (both presented in Supplementary Figure 3E) to obtain the  
395 excitonic signal. Kinetic analyses on the result by this method are plotted in  
396 Supplementary Figure 4. The results from this method and that from the more  
397 accurate method in Supplementary Figure 3F turn out to be essentially the same.

398

399 **Supplementary Note 6: Larger flux results in slower graphene signal decay**

400 MoSe<sub>2</sub> absorbs 14% and graphene absorbs 4.14% of 3.1 eV photons. Under ideal  
401 fast equilibrium, ~9% of excitation photons would be in either layer of the  
402 heterostructure. However, because the graphene Fermi level is between MoSe<sub>2</sub> VBM  
403 and CBM, more carriers are expected to flow into graphene. From photoluminescence,  
404 we can see that around 15% of free carriers that are originally excited in MoSe<sub>2</sub>  
405 remain in MoSe<sub>2</sub>. Estimated from the results with 1.03 eV photons, about 33% free  
406 carriers form interlayer excitons. These two portions together account for 6% of the  
407 18.14% total absorption. Therefore, the excitation flux the graphene layer gains from  
408 interlayer charge transfers must not exceed 12.5% (300% of 4.14%) besides direct  
409 absorption. The charge transfers results in higher electronic temperature and slower  
410 dynamics in graphene.

411

412 **Supplementary Note 7: MoSe<sub>2</sub> bandgap**

413 According to STM measurements<sup>12</sup>, the bandgap of MoSe<sub>2</sub> monolayer samples  
414 on different substrates varies. On graphite, it is 1.94 eV, whereas on bilayer graphene  
415 it is 2.18 eV. The PL peak central frequency also varies from 1.67 eV to 1.63 eV at  
416 77K. The determined binding energy is 0.55 eV, slightly higher than the theoretical  
417 value 0.47 eV<sup>13</sup>. The PL central frequency of our sample at room temperature is 1.56  
418 eV (on graphene). 1.56 + 0.47 = 2.03 eV. Considering all results from literature and  
419 our own experiments, we adopt around 2.0 eV as the bandgap of MoSe<sub>2</sub> in the  
420 heterostructures measured in our experiments.

421

422 **Supplementary Note 8: Ratio of electron/hole transferred from graphene to**

423 **MoSe<sub>2</sub>**

424 The population of electrons in graphene that have higher energy than the CBM  
425 value of MoSe<sub>2</sub> and thus are capable of interlayer transferring is calculated as

426 
$$n_e(T; E_{\text{CBM}}) = \int_{E_{\text{CBM}}}^{+\infty} \frac{\mathcal{E}}{2\pi(\hbar v_F)^2} f(\mathcal{E} - \mu) d\mathcal{E}. \quad (13)$$

427 Similarly, the population of holes being capable of interlayer transferring is

428 
$$n_h(T; E_{\text{VBM}}) = \int_{-\infty}^{E_{\text{VBM}}} \frac{\mathcal{E}}{2\pi(\hbar v_F)^2} f(-\mathcal{E} + \mu) d\mathcal{E}. \quad (14)$$

429 By subtracting the populations before pumping ( $T_0=300\text{K}$ ), the ratio of  $n_h/n_e$   
430 determined is plotted in Supplementary Figure 7. With 100% flux of 1200nm  
431 excitation, the electronic temperature reaches 1583K. At this temperature,  $n_h/n_e$  is 4.9.

432 With 2/3 flux, the electronic temperature reaches 1399 K and  $n_h/n_e$  is 5.8. Because  
433 charge transfers result in a lower temperature, the exact  $n_h/n_e$  should lie between these  
434 two values. Interlayer charge transfers and electronic thermalization in graphene are  
435 extremely fast ( $<50$  fs)<sup>4, 14, 15</sup>. Thus, they can be treated as semi-instantaneous,  
436 compared to the electron/hole recombination (100~200 fs) in graphene and the  
437 formation of interlayer excitons (~500 fs). Therefore, the transfer of photo-excited  
438 charge carriers between two layers forms a quasi-equilibrium in which the  
439 electron/hole population ratio in MoSe<sub>2</sub> is approximately equal to that in graphene.  
440 Once the charge carriers form interlayer excitons, the interlayer quasi-equilibrium is  
441 perturbed and more carriers are transferred to MoSe<sub>2</sub> as the charge carriers in  
442 graphene are continuously adjusting their population distributions. This process  
443 makes sure that even though the hole population in graphene below the VBM of  
444 MoSe<sub>2</sub> is only a small portion of the total number photo-generated, the total number  
445 of transferred holes is still substantial. The process results in that the majority of  
446 interlayer excitons have their holes in the MoSe<sub>2</sub> layer and electrons in graphene. The  
447 estimated exciton density is about  $0.45 \times 10^{12} \text{ cm}^{-2}$  and  $0.58 \times 10^{12} \text{ cm}^{-2}$  under the  
448 excitation photon energy 1.03 eV and 3.1 eV, respectively. Another possible  
449 mechanism can also lead to that electrons stay in graphene and holes prefer MoSe<sub>2</sub>.  
450 According to literature<sup>11</sup>, charged impurities in MoSe<sub>2</sub> and graphene can produce an  
451 effective electric field that is from graphene to MoSe<sub>2</sub>. Such an electric field can  
452 provide driving force for holes to move to MoSe<sub>2</sub> and for electrons to go to graphene.  
453

454 **Supplementary Note 9: Kinetic analysis**

455 To analyze the electron/hole gas transformation dynamics, we create a kinetic  
 456 model. In the model, interlayer charge transfers and electronic thermalization in  
 457 graphene are assumed to be semi-instantaneous. Free carriers (y) in graphene decay  
 458 with a total rate constant  $k_3$ . The interlayer exciton (x) formation rate constant is  $k_1$   
 459 and the exciton decay rate constant is  $k_2$ . The model can be expressed as

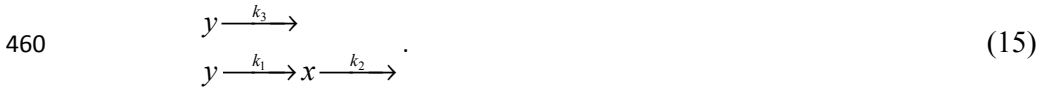

461 The solution of the kinetic model is

462 
$$\begin{aligned} \frac{dx}{dt} &= k_1[y] - k_2[x] \\ \frac{dy}{dt} &= -k_3[y] \end{aligned} \quad , \quad (16)$$

$$x(t) = \frac{k_1}{k_3 - k_2} (1 - e^{-(k_3 - k_2)t}) e^{-k_2 t}$$

463 where  $k_3$  is obtained from the electronic decay of graphene.  $k_1$  and  $k_2$  are  
 464 obtained from fitting the experimental excitonic signal.

465 In Supplementary Figure 3F,  $1/k_1 = 364 \text{ fs}$ ,  $1/k_2 = 65 \text{ ps}$ ,  $1/k_3 = 120 \text{ fs}$ .

466 In Supplementary Figure 4F,  $1/k_1 = 379 \text{ fs}$ ,  $1/k_2 = 55 \text{ ps}$ ,  $1/k_3 = 170 \text{ fs}$ .

467 The binding energy of MoSe<sub>2</sub> intralayer exciton is >0.4 eV, which exceeds the  
 468 photon energy of our IR probe. In addition, the optical response of free carriers in  
 469 MoSe<sub>2</sub> is only 1/6 of the free carriers in graphene. Therefore, in the kinetic model the  
 470 contribution from free carriers in MoSe<sub>2</sub> is ignored. The response ratio 1/6 is  
 471 calculated based on experimental results: with the same 3.1 eV excitation, 14%  
 472 photons are absorbed by MoSe<sub>2</sub>, producing a signal size of -0.006, whereas 4.14%

473 photons are absorbed by graphene producing a signal size of -0.011.  
 474  $0.011/0.006*14\%/4.14\% \sim 6$ .

475

### 476 **Supplementary Note 10: Exciton and free carrier optical responses**

477 The free carrier optical conductivity from the Drude model<sup>16</sup> is

$$478 \quad \sigma_{free} = \frac{ne^2\tau}{\mu(\omega^2\tau^2 + 1)} = \frac{n\hbar e^2\Gamma_D}{\mu[(\hbar\omega)^2 + \Gamma_D^2]}, \quad (17)$$

479 where  $n$  is the carrier population,  $\mu$  is the reduced mass and  $\Gamma_D$  is the scattering  
 480 (dephasing) line width. The 1s-2p transition optical conductivity<sup>17</sup> is

$$481 \quad \sigma_{1s-2p} = \frac{n_X \hbar e^2 \Gamma_{1s-2p} \cdot (\hbar\omega)^2 f_{1s-2p}}{\mu \left[ ((\hbar\omega)^2 - E_{res}^2)^2 + (\hbar\omega \Gamma_{1s-2p})^2 \right]}, \quad (18)$$

482 where  $E_{res}$  is the resonant energy. The optical conductivity ratio between the 1s-2p  
 483 transition and free carrier is therefore:

$$484 \quad \frac{\sigma_{1s-2p}}{\sigma_{e-h}} \approx \frac{2n_X f_{1s-2p}}{\Gamma_{1s-2p}} \bigg/ \frac{n_{e-h} \Gamma_D}{(\hbar\omega)^2} \approx \frac{2f_{1s-2p} (\hbar\omega)^2}{\Gamma_D \Gamma_{1s-2p}}, \quad (19)$$

485 where  $f_{1s-2p}$  is the oscillator strength that can be calculated in the following<sup>18</sup>:

$$486 \quad \begin{aligned} f_{1s-n} &= \frac{2\mu a^2}{\hbar^2} (E_n - E_0) \frac{\left(\frac{n+1}{2}\right)^5 n^{2n-3}}{(n+1)^{2n+5}} \\ &= \frac{2\mu a^2}{\hbar^2} \cdot \frac{e^2 \lambda}{8\pi \epsilon_0 \epsilon_r a} \left[ \frac{1}{(1/2)^2} - \frac{1}{(n+1/2)^2} \right] \frac{\left(\frac{n+1}{2}\right)^5 n^{2n-3}}{(n+1)^{2n+5}} \\ &= \frac{\mu e^2 \lambda a}{4\pi \epsilon_0 \epsilon_r \hbar^2} \left[ \frac{1}{(1/2)^2} - \frac{1}{(n+1/2)^2} \right] \frac{\left(\frac{n+1}{2}\right)^5 n^{2n-3}}{(n+1)^{2n+5}} \\ &= \frac{\mu e^2 \lambda}{4\pi \epsilon_0 \epsilon_r \hbar^2} \cdot \frac{4\pi \hbar^2 \epsilon_0 \epsilon_r}{e^2 \mu \lambda} \left[ \frac{1}{(1/2)^2} - \frac{1}{(n+1/2)^2} \right] \frac{\left(\frac{n+1}{2}\right)^5 n^{2n-3}}{(n+1)^{2n+5}} \\ &= \left[ \frac{1}{(1/2)^2} - \frac{1}{(n+1/2)^2} \right] \frac{\left(\frac{n+1}{2}\right)^5 n^{2n-3}}{(n+1)^{2n+5}} \end{aligned} \quad (20)$$

487 Based on Supplementary Equation 18,  $f_{1s-2p} = 0.21$ , slightly different from the  
 488 value 0.32 derived from a non-hydrogen model<sup>17</sup>.  $\Gamma_{1s-2p}$  is experimentally determined

489 to be  $280 \text{ cm}^{-1}$ . Using the ratio  $\Gamma_D / \Gamma_{1s-2p} = 6$  adopted in literature<sup>18</sup>,  $\frac{\sigma_{1s-2p}}{\sigma_{e-h}}$  is  
490 calculated to be 3.6. However,  $\frac{\sigma_{1s-2p}}{\sigma_{e-h}}$  calculated here is for exciton and free carrier in  
491 the same material. In our experiments, the interlayer exciton is within two very  
492 different materials of which the free carrier response ratio is  $1/6 = \text{MoSe}_2/\text{graphene}$ . It  
493 is reasonable to expect that  $\sigma_{1s-2p}$  of the  $\text{MoSe}_2/\text{graphene}$  interlayer exciton is 1~3.5  
494 times (it doesn't go to 6 because the 1s-2p transition is a bound-bound transition and  
495 graphene cannot affect it in a way like free carriers) of  $\sigma_{1s-2p}$  of  $\text{MoSe}_2$ , giving  
496  $\frac{\sigma_{1s-2p\text{-interlayer}}}{\sigma_{e-h\text{-graphene}}} = 0.6 \sim 2.1$ . Normalized with the ratio, the excitonic formation time  
497 constants obtained from fitting the experimental results in Supplementary Figure  
498 3F&4F are 218 fs~764 fs (Supplementary Figure 3F) and 227 fs~796 fs  
499 (Supplementary Figure 4F), respectively.

500

### 501 **Supplementary Note 11: Exciton 1s-2p transition energy calculations**

#### 502 Methods:

503 First-principle calculations in this work are conducted using DFT methods  
504 implemented in the Vienna *ab initio* simulation package (VASP)<sup>19</sup>. The  
505 projector-augmented-wave (PAW) pseudopotentials and the generalized gradient  
506 approximation of Perdew, Burke, and Ernzerhof (PBE) for exchange-correlation  
507 functional are adopted in our simulations<sup>20</sup>. In order to study the influence of Fermi  
508 level on the electronic properties for hole-doped graphene system, we conducted the  
509 first-principle investigation on the electronic band structures of graphene sheets



510 ( $N \times N \times 1$  primitive unit cell) doped by the Boron atoms (which can effectively  
511 modulate the position of Fermi level but minimally alter other physical properties of  
512 graphene). For Brillouin zone (BZ) integrations, a Monkhorst-Pack k-point mesh  
513 scheme with  $7 \times 7 \times 1$  are adopted<sup>21</sup>. Meanwhile, for graphene and monolayer MoSe<sub>2</sub>  
514 system, we use a  $9 \times 9 \times 1$  k-meshes for Brillouin zone sampling in the  
515 Monkhorst-Pack scheme. In order to simulate the graphene/MoSe<sub>2</sub> 2D  
516 heterostructures, we impose a commensurability condition between them, where a  
517  $4 \times 4$  supercell of the graphene is used to match a  $3 \times 3$  supercell of the MoSe<sub>2</sub>  
518 monolayer. The lateral lattice parameter for the triangular lattice of graphene/MoSe<sub>2</sub>  
519 nanocomposite is set to be  $a(\text{graphene/MoSe}_2) = (4 \cdot a(\text{graphene}) + 3 \cdot a(\text{MoSe}_2)) =$   
520  $9.912 \text{ \AA}$ , in which  $a(\text{graphene}) = 2.468 \text{ \AA}$  and  $a(\text{MoSe}_2) = 3.317 \text{ \AA}$  are optimized for  
521 isolated graphene and monolayer MoSe<sub>2</sub>, respectively. Since there is only a very small  
522 lattice mismatch of  $\sim 0.4\%$  between the graphene and the MoSe<sub>2</sub> monolayers, the  
523 approximation used here is reasonable. Boron-doped graphene/MoSe<sub>2</sub> nanocomposite  
524 in which one random carbon atom is replaced with a boron atom is also used to study  
525 the influence of doping on the thickness of graphene/MoSe<sub>2</sub> heterojunction (along z  
526 direction). Since the heterostructure contains one graphene and one MoSe<sub>2</sub> monolayer,  
527 van der Waals (vdW) interactions are taken into account by using the semi-empirical  
528 DFT-D3 method<sup>22</sup>. For the pristine as well as the boron-doped graphene/MoSe<sub>2</sub>  
529 heterojunction, a  $5 \times 5 \times 1$  Monkhorst-Pack k-point mesh is used. A cutoff of 500 eV  
530 is used for the plane-wave expansion of the wave function to converge the relevant  
531 quantities. The structure relaxations are carried out until all the atomic forces on each

532 ion are less than  $0.01 \text{ eV}/\text{\AA}$ , enforcing a total energy convergence of  $1 \times 10^{-7} \text{ eV}$ . To  
533 avoid spurious interactions with replicas, a vacuum slab larger than  $15 \text{ \AA}$  is added in  
534 the z direction for all system.

535 Results:

536 As demonstrated in Supplementary Figure 8, the Fermi energy levels are adjusted,  
537 by boron doping, to the valence bands and the whole doping system acts as a p-dopant.  
538 Supplementary Figure 9(a) shows the Fermi energy levels of the doped graphene with  
539 different  $N \times N$  primitive cells. With the decrease of dopant concentration, the Fermi  
540 energy level gradually decreases to the experimental value. As the Fermi energy level  
541 of boron-doped graphene reaches the experimental value ( $-0.17 \text{ eV}$ ), the primitive cell  
542 size is  $26.1 \times 26.1$ , and the calculated effective mass of B-doped system for electron  
543 and hole is 0.0116 and 0.0121, respectively. (Supplementary Figure 9(a))

544 The optimized thickness between the two layers (C atom - Mo atom) of  
545 Boron-doped graphene/MoSe<sub>2</sub> heterojunction is  $5.178 \text{ \AA}$ , which is very close to the  
546 value of undoped heterojunction ( $5.183 \text{ \AA}$ ), thereby low concentration of boron doping  
547 does not alter the thickness between the two layers significantly. Furthermore, the  
548 in-plane dielectric constant of B-doped graphene is almost equal to the value of  
549 pristine graphene when the primitive cell size is larger than  $8 \times 8$ . We set the dielectric  
550 constant of graphene/MoSe<sub>2</sub> heterojunction as  $\bar{\epsilon} = 4.969$ , which is the average value  
551 of the calculated in-plane dielectric constant  $\epsilon_{xx} = 3.651$  and  $6.287$  for graphene and  
552 monolayer MoSe<sub>2</sub>, respectively.

553 To obtain the potential experienced by an electron at  $(\rho, z)$  due to the presence of

554 a hole at  $(0, z_0)$ , we use a field method described by Smythe<sup>23</sup> and extended by  
 555 Sritharan<sup>13</sup>:

$$\begin{aligned}
 556 \quad & V(\rho) = \\
 557 \quad & -\frac{e^2}{4\pi\epsilon_0\bar{\epsilon}} \left\{ \frac{1}{\sqrt{(z-z_0)^2+\rho^2}} + \sum_{n=0}^{\infty} \left( \frac{\beta_N}{\beta_P} \right)^n \left[ \frac{\beta_N/\beta_P}{\sqrt{(z-z_0+2c+2nc)^2+\rho^2}} + \frac{\beta_N/\beta_P}{\sqrt{(z_0-z+2c+2nc)^2+\rho^2}} + \right. \right. \\
 558 \quad & \left. \left. \frac{(K_2-K_1)/(K_2+K_1)}{\sqrt{(z+z_0-2a+2nc)^2+\rho^2}} + \frac{(K_2-K_3)/(K_2+K_3)}{\sqrt{(2b-z-z_0+2nc)^2+\rho^2}} \right] \right\}, \quad (21)
 \end{aligned}$$

559 where  $\beta_P = (\bar{\epsilon} + 1)^2$  and  $\beta_N = (\bar{\epsilon} - 1)^2$ ,  $K_1=K_3=1$  since the graphene/MoSe<sub>2</sub>  
 560 heterojunction is approximated as a single dielectric slab sandwiched between  
 561 vacuum. When the electron and hole are at different layers, they are assumed to be at  
 562 the center of the graphene and MoSe<sub>2</sub> monolayer along the z direction with a fixed  
 563 distance of 5.183 Å which is the thickness of heterojunction. The exciton is then  
 564 simplified as a two dimensional quasi-particle<sup>24</sup>.

565 When the hole is in graphene and the electron is in the MoSe<sub>2</sub> layer, the effective  
 566 mass of exciton can be obtained from  $\frac{1}{\mu} = \frac{1}{m_h^*} + \frac{1}{m_e^*}$ , where the effective mass of  
 567 monolayer MoSe<sub>2</sub> conduction band  $m_e^* = 0.502m_0$  (Supplementary Figure 10) and  
 568 the effective mass of B-doped graphene valence band  $m_h^* = 0.0121m_0$ ,  $m_0$  is the  
 569 free electron mass. Based on the finite element method, we then solved the  
 570 Schrödinger equation on a  $2 \times 10^3$  Å circle plane, with the effective mass of the  
 571 excitonic quasi particle and aforementioned Coulomb potential. The eigenvalues and  
 572 selected eigenfunctions calculated are presented in Supplementary Figure 11a. The  
 573 exciton transition energy between 1s and 2p is  $E_{1s-2p} = 0.274$  eV, and the means  
 574 radius of wave functions for 1s CT is  $\langle \rho_{CT_{1s}} \rangle = 45.3$  Å. The 1s-1p transition energy is  
 575 also larger than 0.20 eV. Both 1s-1p and 1s-2p transition energy values are close to the

576 experimental value 0.27 eV.

577 When electron is in graphene and hole is in MoSe<sub>2</sub>, the hole and electron  
578 effective masses should be the effective masses of the monolayer MoSe<sub>2</sub> valence  
579 band (0.583  $m_0$ ) and B-doped graphene conduction band (0.0116  $m_0$ ), respectively.  
580 The eigenvalues and selected eigenfunctions are presented in Supplementary Figure  
581 11b. The exciton transition energy between 1s and 2p is  $E_{1s-2p} = 0.267$  eV, and the  
582 mean radius of wave functions for 1s CT is  $\langle \rho_{CT_{1s}} \rangle = 46.6$  Å. There is a 0.007 eV  
583 difference between the binding energies in two conditions. In our experiments, the  
584 difference is too small to distinguish.

585 Note that the energies are calculated for the Fermi level of -0.17 eV, for Fermi  
586 level of -0.19 eV, the calculated values are provided at the end of this summary.

587 In principle, the exciton 1s-2p transition energy can be estimated by performing  
588 the quasiparticle GW and Bethe-Salpeter equation (BSE) calculations. To model the  
589 experimental condition herein for the boron doped graphene/MoSe<sub>2</sub> heterojunction,  
590 however, the system constructed should contain more than 1200 atoms (the supercell  
591 of graphene should be larger than  $26 \times 26$ ). On the other hand, to achieve well-converged  
592 quasiparticle energies, especially when there is a transition metal element (Mo) in the  
593 system, a dense enough ( $21 \times 21 \times 1$ ) k-grid, a large energy cutoff ( $\sim 40$  Ry) and a large  
594 number ( $> 10000$ ) of unoccupied states is needed<sup>12, 25</sup>. The calculation cost is  
595 therefore far beyond the computing resource we can afford.

596

597 **Supplementary Note 12: Al-doped Graphene**

598 To explore the possible effect of dopant rather than Fermi level on the binding  
599 energy, we also compute the interlayer exciton binding energy with Al-doped  
600 graphene.

601 As demonstrated in *Supplementary Figure 15*, the Fermi energy levels are  
602 adjusted, by aluminum doping, to the valence bands and the whole doping system also  
603 acts as a p-dopant. *Supplementary Figure 15* shows the Fermi energy levels of the  
604 doped graphene with different  $N \times N$  primitive cells. With the decrease of dopant  
605 concentration, the Fermi energy level gradually decreases to the experimental value.  
606 As the Fermi energy level of aluminum-doped graphene reaches the experimental  
607 value (-0.17eV), the primitive cell size is  $13 \times 13$  (*Supplementary Figure 16*), and the  
608 calculated effective mass of Al-doped system for electron and hole is 0.0122 and  
609 0.0135, respectively. (*Supplementary Figure 17*)

610 When the hole is in graphene and the electron is in the  $\text{MoSe}_2$  layer, the effective  
611 mass of exciton can be obtained from  $1/(\mu) = 1/(m_h^*) + 1/(m_e^*)$ , where the effective  
612 mass of monolayer  $\text{MoSe}_2$  conduction band  $m_e^* = 0.502m_0$  (*Supplementary Figure 18*)  
613 and the effective mass of Al-doped graphene valence band  $m_h^* = 0.0122m_0$ .  $m_0$  is  
614 the free electron mass. Based on the finite element method, we then solved the  
615 Schrödinger equation on a  $2 \times 10^3 \text{ \AA}$  circle plane, with the effective mass of the  
616 excitonic quasi particle and aforementioned Coulomb potential. The eigenvalues and  
617 selected eigenfunctions calculated are presented in *Supplementary Figure 18A*. The  
618 exciton transition energy between 1s and 2p is  $E_{1s-2p} = 0.275 \text{ eV}$ , and the means radius  
619 of wave functions for 1s CT is  $\langle \rho_{CT_{1s}} \rangle = 45.7 \text{ \AA}$ .

620 When electron is in graphene and hole is in MoSe<sub>2</sub>, the hole and electron  
621 effective masses should be the effective masses of the monolayer MoSe<sub>2</sub> valence band  
622 0.583  $m_0$  and Al-doped graphene conduction band 0.0135  $m_0$ , respectively. The  
623 eigenvalues and selected eigenfunctions are presented in Supplementary Figure 18b.  
624 The exciton transition energy between 1s and 2p is  $E_{1s-2p} = 0.292$  eV, and the means  
625 radius of wave functions for 1s CT is  $\langle \rho_{CT_{1s}} \rangle = 42.3 \text{ \AA}$ .

626

627 **Supplementary Note 13: Both electron and hole effective masses of graphene are**  
628 **0.012 $m_0$**

629 Using 0.012 $m_0$  reported for a CVD-grown graphene (JAP, 113, 043708, 2013),  
630 we also calculate the interlayer binding energy.

631 In summary, the binding energy is only slightly affected by the nature of dopant.  
632 In three different calculations, the binding energy is between 0.265~0.292 eV. All are  
633 very close to the experimental value.

634

635 **Supplementary Note 14: Origin of carrier reduced mass in graphene and large**  
636 **interlayer binding energy**

637 It is well known that the effective mass of the pristine graphene is zero, i.e., the  
638 effect mass of the state at  $\mathbf{k} = 0$  (Dirac point, at which the Fermi level lie in the  
639 pristine graphene) is zero. However, when the  $\mathbf{k}$  point deviates from the Dirac point,  
640 e.g., the Fermi level shifts due to the effect of doping, the effective mass is no longer  
641 zero. We can approximately evaluate this effect based on a tight-binding (TB) model.

642 Under a TB approach, the energy dispersion of graphene near the Fermi points is  
 643 expressed as Dirac cones:

$$644 \quad E(\mathbf{k}) = \frac{3}{2} t_0 a_0 |\mathbf{k}|, \quad (22)$$

645 where  $a_0 = 2.42 \text{ \AA}$  is the equilibrium C-C bond length, and  $t_0 \approx 2.7 \text{ eV}$  is the hopping  
 646 energy between the nearest C atoms. The effective mass at  $\mathbf{k}$  is defined as

$$647 \quad m^*(\mathbf{k}) = \frac{\hbar^2}{\frac{\partial^2 E(\mathbf{k})}{\partial \mathbf{k}^2}}. \quad (23)$$

648 When  $\mathbf{k} \neq 0$ , the energy dispersion along the normal direction has a finite curvature  
 649 (effective mass) as shown as the solid lines in Supplementary Figure 21. Based on  
 650 Supplementary Equation (22) and (23), the effective mass of electrons at the Fermi  
 651 level (chemical potential  $\mu$ ) along the normal direction is given as

$$652 \quad m^* \Big|_{E(\mathbf{k})=\mu} = \frac{4\hbar^2}{9t_0^2 a_0^2} |\mu|. \quad (24)$$

653 The dependence of the effective mass on the chemical potential is plotted in  
 654 Supplementary Figure 22. It can be seen that  $m^* = 0$  for pristine graphene ( $\mu = 0$ ), but  
 655 it linearly increases with increasing  $|\mu|$ . For  $\mu = -0.17 \text{ eV}$ ,  $m^* \approx 0.039m_0$ . If we  
 656 roughly regard the effective mass along the radical direction as unchanged (equal to 0  
 657 as that in pristine graphene), a direct average on both the normal and radical  
 658 directions give  $m^* \approx 0.02m_0$  under  $\mu = -0.17 \text{ eV}$ . This estimated value is actually very  
 659 close to  $m^* \approx 0.0116m_0$  from the ab initio calculations assuming B-doped.

660 In 3D systems, the electric potential of a point charge under the screening of a  
 661 dielectric surrounding with a relative dielectric constant  $\epsilon$  is described by a screened  
 662 Coulomb potential (in atomic units)

663 
$$V_{3D}(\mathbf{r}) = \frac{1}{\epsilon r} \quad (25)$$

664 by solving the Poisson's equation, which gives the exciton binding energy of the  
 665 hydrogen-like model:

666 
$$E_{b,3D}(\mathbf{r}) = \frac{m^*}{2\epsilon^2}, \quad (26)$$

667 where  $m^*$  is the reduced effective mass. Supplementary Equation (26) suggests that  $E_b$   
 668 is proportional to  $m^*$ .

669 However, for a 2D dielectric sheet embedded into vacuum such as single-layer  
 670 MoSe<sub>2</sub> or other 2D systems considered in experiments, the 2D screened potential is  
 671 not given as a screened Coulomb potential:

672 
$$V_{2D}(\mathbf{r}) \neq \frac{1}{\epsilon r}, \quad (27)$$

673 but is given as a complicated function in terms of the Struve function and the second  
 674 kind Bessel function [refer to: P. Cudazzo, I. V. Tokatly, and A. Rubio, *Phys. Rev. B* **84**,  
 675 085406 (2011)], which was also listed as Supplementary Equation (19). As a result,  
 676 the binding energy of 2D exciton is not described by Supplementary Equation (26),  
 677 but is given as [refer to: T. Olsen, S. Latini, F. Rasmussen, and K. S. Thygesen, *Phys.*  
 678 *Rev. Lett.* **116**, 056401 (2016)]

679 
$$E_{b,2D} = \frac{8m^*}{\left(1 + \sqrt{1 + \frac{32\pi\alpha m^*}{3}}\right)^2}, \quad (28)$$

680 where  $\alpha$  is the 2D polarizability calculated as  $\alpha = L \frac{\epsilon - 1}{4\pi}$  where  $\epsilon$  is the dielectric  
 681 constant of bulks and  $L$  is the thickness of the 2D sheet. A remarkable property in  
 682 Supplementary Equation (28) is that  $E_b$  is no longer linearly proportional to  $m^*$ . When



683  $am^*$  is large enough, we have  $E_{b,2D} \approx \frac{3}{4\pi\alpha}$  which is independent on  $m^*$ .  
684 Supplementary Equation 26 is applicable to both undoped and doped 2D systems. An  
685 exciton is formed between an electron and a hole no matter whether the system is  
686 doped or undoped, and the influence of doping just lies in its screening effect. As the  
687 Fermi energy level of boron-doped graphene reaches the experimental value ( $-0.17$   
688 eV), the primitive cell size is 26.1 (refer to page 17 of SI), and the doping ratio is  
689 actually small (less than 0.2%). Our ab initio calculation shows that the in-plane  
690 dielectric constant of B-doped graphene is almost equal to the value of pristine  
691 graphene when the primitive cell size is larger than 8 (refer to page 19 of SI).  
692 Therefore, the screening effect in doped graphene is very weak.

693 Take the graphene-MoSe<sub>2</sub> as an example,  $\bar{\epsilon} \approx 4.97$  and  $L \approx 10.4 \text{ \AA}$ , so we have  $\alpha$   
694  $= 6.17$  (in atomic units).  $E_b$  is plotted in Supplementary Figure 23 as a function of  $m^*$   
695 based on Supplementary Equation (28), measured with respect to that of  $m^* = 0.6$   
696 (the value for MoSe<sub>2</sub>). The result of Supplementary Equation (26) is also plotted to  
697 provide a comparison. It can be seen that the dependence of  $E_b$  on  $m^*$  is highly  
698 nonlinear for the 2D result in Supplementary Equation (28). For  $m^* = 0.01m_0$ , the 3D  
699 result in Supplementary Equation (26) gives  $E_b(m^* = 0.01)/E_b(m^* = 0.6) = 1/60$ , i.e.,  
700 the binding energy for  $m^* = 0.01$  of graphene-MoSe<sub>2</sub> is 60 times smaller compared to  
701 that of MoSe<sub>2</sub> as indicated by the reviewer, but the 2D result in Supplementary  
702 Equation (28) gives  $E_b(m^*=0.01)/E_b(m^*=0.6) \approx 1/3.1$ . In other words, with the 2D  
703 equation, the binding energy for  $m^* = 0.01$  of graphene-MoSe<sub>2</sub> is merely 3.1 times  
704 smaller compared to that of MoSe<sub>2</sub>. Taking the 0.4-0.6 eV binding energy for the latter,

705 one may expect a binding energy of 0.13-0.19 eV for the graphene-MoSe<sub>2</sub> exciton,  
706 which is close to the results from our measurements. In our work, we used a more  
707 sophisticated theory that has been tested with other 2D systems (JACS 2015, 137,  
708 8313-8320; Nat. Commun. 2016, 7, 12512) to calculate the binding energy and it  
709 turns out to be very close to the experimental value. The dependence of calculated  
710 1s-2p transition energy on reduced mass is plotted in Supplementary Figure 12.  
711

## Supplementary References

712

- 713 1. Dawlaty JM, *et al.* Measurement of the optical absorption spectra of epitaxial  
714 graphene from terahertz to visible. *Applied Physics Letters* **93**, (2008).  
715
- 716 2. Gusynin VP, Sharapov SG, Carbotte JP. Unusual microwave response of Dirac  
717 quasiparticles in graphene. *Phys Rev Lett* **96**, (2006).  
718
- 719 3. Mikhailov SA, Ziegler K. New electromagnetic mode in graphene. *Phys Rev*  
720 *Lett* **99**, (2007).  
721
- 722 4. Malard LM, Mak KF, Neto AHC, Peres NMR, Heinz TF. Observation of intra-  
723 and inter-band transitions in the transient optical response of graphene. *New J*  
724 *Phys* **15**, (2013).  
725
- 726 5. Ma Q, *et al.* Tuning ultrafast electron thermalization pathways in a van der  
727 Waals heterostructure. *Nature Physics* **12**, 455-+ (2016).  
728
- 729 6. Kampfrath T, Perfetti L, Schapper F, Frischkorn C, Wolf M. Strongly coupled  
730 optical phonons in the ultrafast dynamics of the electronic energy and current  
731 relaxation in graphite. *Phys Rev Lett* **95**, (2005).  
732
- 733 7. Piscanec S, Lazzeri M, Mauri F, Ferrari AC, Robertson J. Kohn anomalies and  
734 electron-phonon interactions in graphite. *Phys Rev Lett* **93**, (2004).  
735
- 736 8. Li ZZ, Wang JY, Liu ZR. Intrinsic carrier mobility of Dirac cones: The  
737 limitations of deformation potential theory. *J Chem Phys* **141**, (2014).  
738
- 739 9. Park CH, *et al.* Electron-Phonon Interactions and the Intrinsic Electrical  
740 Resistivity of Graphene. *Nano Lett* **14**, 1113-1119 (2014).  
741
- 742 10. Lui CH, Mak KF, Shan J, Heinz TF. Ultrafast Photoluminescence from  
743 Graphene. *Phys Rev Lett* **105**, (2010).  
744
- 745 11. Zhang WJ, *et al.* Ultrahigh-Gain Photodetectors Based on Atomically Thin  
746 Graphene-MoS<sub>2</sub> Heterostructures. *Scientific Reports* **4**, (2014).  
747
- 748 12. Ugeda MM, *et al.* Giant bandgap renormalization and excitonic effects in a  
749 monolayer transition metal dichalcogenide semiconductor. *Nat Mater* **13**,  
750 1091-1095 (2014).  
751
- 752 13. Berkelbach TC, Hybertsen MS, Reichman DR. Theory of neutral and charged  
753 excitons in monolayer transition metal dichalcogenides. *Phys Rev B* **88**,  
754 (2013).

- 755  
756 14. Hong XP, *et al.* Ultrafast charge transfer in atomically thin MoS<sub>2</sub>/WS<sub>2</sub>  
757 heterostructures. *Nat Nanotechnol* **9**, 682-686 (2014).  
758  
759 15. Chen HL, *et al.* Ultrafast formation of interlayer hot excitons in atomically  
760 thin MoS<sub>2</sub>/WS<sub>2</sub> heterostructures. *Nat Commun* **7**, 12512 (2016).  
761  
762 16. Wang HN, Zhang CJ, Rana F. Ultrafast Dynamics of Defect-Assisted Electron  
763 Hole Recombination in Mono layer MoS<sub>2</sub>. *Nano Lett* **15**, 339-345 (2015).  
764  
765 17. Poellmann C, *et al.* Resonant internal quantum transitions and femtosecond  
766 radiative decay of excitons in monolayer WSe<sub>2</sub>. *Nat Mater* **14**, 889-+ (2015).  
767  
768 18. Kaindl RA, Hagele D, Carnahan MA, Chemla DS. Transient terahertz  
769 spectroscopy of excitons and unbound carriers in quasi-two-dimensional  
770 electron-hole gases. *Phys Rev B* **79**, (2009).  
771  
772 19. Kresse G, Furthmuller J. Efficient iterative schemes for ab initio total-energy  
773 calculations using a plane-wave basis set. *Phys Rev B* **54**, 11169-11186 (1996).  
774  
775 20. Perdew JP, Burke K, Ernzerhof M. Generalized gradient approximation made  
776 simple. *Phys Rev Lett* **77**, 3865-3868 (1996).  
777  
778 21. Monkhorst HJ, Pack JD. SPECIAL POINTS FOR BRILLOUIN-ZONE  
779 INTEGRATIONS. *Phys Rev B* **13**, 5188-5192 (1976).  
780  
781 22. Grimme S, Antony J, Ehrlich S, Krieg H. A consistent and accurate ab initio  
782 parametrization of density functional dispersion correction (DFT-D) for the 94  
783 elements H-Pu. *J Chem Phys* **132**, (2010).  
784  
785 23. Ramasubramaniam A. Large excitonic effects in monolayers of molybdenum  
786 and tungsten dichalcogenides. *Phys Rev B* **86**, (2012).  
787  
788 24. Zhu XY, Monahan NR, Gong ZZ, Zhu HM, Williams KW, Nelson CA. Charge  
789 Transfer Excitons at van der Waals Interfaces. *J Am Chem Soc* **137**, 8313-8320  
790 (2015).  
791  
792 25. Qiu DY, da Jornada FH, Louie SG. Optical Spectrum of MoS<sub>2</sub>: Many-Body  
793 Effects and Diversity of Exciton States. *Phys Rev Lett* **111**, (2013).  
794  
795 26. Tonndorf P, *et al.* Photoluminescence emission and Raman response of  
796 monolayer MoS<sub>2</sub>, MoSe<sub>2</sub>, and WSe<sub>2</sub>. *Opt Express* **21**, 4908-4916 (2013).  
797  
798
